# RedMed: Extending drug lexicons for social media applications

Adam Lavertu

*Biomedical Informatics Training Program, Stanford University, Stanford, CA 94305, USA*

Russ B Altman\*

*Department of Bioengineering, Stanford University, Stanford, CA 94305, USA*

---

## Abstract

Social media has been identified as a promising potential source of information for pharmacovigilance. The adoption of social media data has been hindered by the massive and noisy nature of the data. Initial attempts to use social media data have relied on exact text matches to drugs of interest, and therefore suffer from the gap between formal drug lexicons and the informal nature of social media. The Reddit comment archive represents an ideal corpus for bridging this gap. We trained a word embedding model, RedMed, to facilitate the identification and retrieval of health entities from Reddit data. We compare the performance of our model trained on a consumer-generated corpus against publicly available models trained on expert-generated corpora. Our automated classification pipeline achieves an accuracy of 0.88 and a specificity of  $>0.9$  across four different term classes. Of all drug mentions, an average of 79% ( $\pm 0.5\%$ ) were exact matches to a generic or trademark drug name, 14% ( $\pm 0.5\%$ ) were misspellings, 6.4% ( $\pm 0.3\%$ ) were synonyms, and 0.13% ( $\pm 0.05\%$ ) were pill marks. We find that our system captures an additional 20% of mentions; these would have been missed by approaches that rely solely on exact string matches. We provide a lexicon of misspellings and synonyms for 2,978 drugs and a word embedding model trained on a health-oriented subset of Reddit.

*Keywords:* Natural Language Processing, Pharmacovigilance, Drug Surveillance, Lexicon, Social Media

---

## 1. Introduction

2 Social media represents a key opportunity for gathering real-world evidence regarding drug  
3 safety and efficacy. The U.S. Food and Drug Administration (FDA) and others have rec-  
4 ognized the utility of social media and have called for further research [1, 2]. Indeed, social  
5 media is already in use by several drug monitoring systems, such as RADARS and NDEWS  
6 [3, 4]. Social media has a large and growing user base within the United States with 69%  
7 of adults reporting the use of at least one social media platform [5]. On an average day,  
8 users generate more than 2.5 million Reddit comments and more than 500 million Tweets.

---

\*Corresponding author

*Email address:* [rbaltman@stanford.edu](mailto:rbaltman@stanford.edu) (Russ B Altman)

10 The result of this large amount of activity is a massive high-frequency data stream that  
11 has the potential to revolutionize the way we study drugs. Social media offers access to an  
12 observational data source that is potentially orthogonal to data streams that are currently  
13 being utilized for gathering real-world data, such as spontaneous event reporting systems,  
14 electronic health records, and surveys. The pseudo-anonymous nature of some of these social  
15 media platforms might make users more inclined to discuss stigmatized behaviors of poten-  
16 tial interest to researchers [6].

17 It is currently difficult to identify social media content regarding drugs at scale. Given the  
18 massive size of these data sets, a first step in most analyses is the identification of relevant  
19 user activity. This first step is crucial and often performed via APIs that are necessary to ac-  
20 cess the social media data. These APIs generally require explicit search terms to identify the  
21 data to be returned to the user. Once data is successfully retrieved, it can be processed by  
22 context aware named entity recognition models for downstream research applications. Ini-  
23 tial efforts have generally relied on identifying relevant social media content through exact  
24 lexical matching to known generic and trademark drug names [7, 8, 9, 10, 11]. Throughout  
25 the rest of this paper, we refer to these exact lexical matches as “known” terms. A few anal-  
26 yses have extended exact match lexicons through the manual curation of ad-hoc single-use  
27 lists of search terms for their drugs of interest [12, 13, 14, 15]. Unfortunately, due to the  
28 informal nature of social media text derived from these platforms displays greater variability  
29 than texts from more formal sources, such as Wikipedia or PubMed [16]. The informality of  
30 the medium very likely results in many drug mentions being missed, such as those that are  
31 slang terms for and/or misspellings of the drug of interest. A recent small scale study, found  
32 around 10% of drug mentions on Twitter were misspelled, with higher rates of misspellings  
33 for drugs of abuse [15].

34 A few efforts have focused specifically on the task of generating lists of potential misspellings  
35 of drug names. Work by Pimpalkhute et al. was one of the first efforts to attempt to algo-  
36 rithmically generate these potential misspellings [17]. Their approach first generated a list of  
37 all potential misspellings that were within 1-edit distance of a given drug name, then filtered  
38 those candidates based on phonetic similarity between the drug name and the proposed mis-  
39 spelling. The final list of candidates was passed through an additional filter based on the  
40 number of search Google search results returned for a query of the proposed misspelling plus  
41 the word “drug”. Their use of a maximum of 1-edit distance from the original drug name  
42 severely limited their effort but was done to avoid the combinatoric explosion that results  
43 from allowing multiple edits. They made no use of semantic information in their approach,  
44 however their use of Google search results as a means of validation seems to have been effec-  
45 tive and is expanded upon in our effort. Sarker et al. made additional progress towards the  
46 goal of generating potential misspellings. [18] This effort is notable for its combination of  
47 both semantic and lexical information, as well as its use of a recursive search strategy. They  
48 utilized a word embedding model to identify tokens that are semantically similar to a given  
49 query term and then filtered the resulting list using weighted Levenshtein ratio, a measure  
50 of lexical similarity. The cutoff for the lexical filter was tuned using a development set of  
51 labeled misspellings. They are similar to our effort in their use of both semantic and lexical  
52 information, but differ in their use of manually curated labels for tuning a cutoff threshold

54 and their consideration of a single drug at a time, rather than a collection of known drug  
55 names. So a search misspellings of "atorvastatin" could potentially result in a false positive  
56 that is another known drug, such as "rosuvastatin". While the research effort from which  
57 they derived their word embeddings explored several parameter settings, it did not optimize  
58 for any particular characteristics within the embedded space [19]. Additional work has been  
59 done to identify keywords consisting of both misspellings and slang terms. Simpson et al.  
60 performed a study to evaluate the validity of word embeddings models train on social media  
61 data for the task of identifying these misspelling and slang terms [13]. They first trained a  
62 continuous bag of words (CBOW) model on 86.2 million Tweets collected from Twitter in  
63 July of 2016. They used a set of marijuana seed terms to produce a list of candidate terms  
64 based on cosine similarity in the embedded space and selected a cutoff using a set of crowd-  
65 sourced marijuana slang terms. They manually curated the final list of 200 candidate terms  
66 and found 32.5% of the candidate terms to be direct references to marijuana. Their method  
67 has limited scalability due to the need for human list curated list of true positives against  
68 which to determine a cutoff for each drug, as well as the reliance on human evaluation of the  
69 final candidate term list. Adams et al. extended this work to consider the interplay between  
70 a particular keyword identification method and the corpus to which that method was applied  
71 [14]. They trained separate CBOW word embedding models on Twitter and Reddit corpora,  
72 then evaluated the effectiveness of two different search strategies to identify misspellings and  
73 phrases in the respective vector spaces. Their analysis was limited to identifying terms re-  
74 lated to marijuana or opioids and their search strategy used only semantic information from  
75 the embedded space. Notably, they found a Reddit corpus filtered for subreddits related  
76 to marijuana and opioids greatly increased the performance of their keyword identification  
77 method. Therefore, a more comprehensive set of social media lexicons is a critical missing  
78 element for the identification of social media data of interest. Our approach incorporates  
79 elements of the approaches used in these efforts and addresses several of their associated  
80 limitations.

82 Word embedding models can capture semantics and are an ideal method for the discovery  
83 of misspellings and synonym terms [20]. These models rely on the distributional hypothesis,  
84 that the meaning of a word is represented by the meaning of the words it co-occurs with in  
85 context [21]. This hypothesis is represented by word co-occurrence statistics, where a model  
86 learns weights while being trained to predict which words are likely to co-occur and which  
87 are not. The learned model weights can then be used as vectorized representations of the  
88 words themselves. Previous work has demonstrated that these vectorized representations  
89 effectively represent word meanings and can be used in combination with vector operators  
90 to facilitate different language tasks [20]. Using word embeddings to represent terms within  
91 a social media corpus, we may be able to identify potential misspellings and synonyms of  
92 given term based on vector distance.

94 The Reddit comment archive (RCA) represents a large publicly available corpus of text gen-  
95 erated in a social media setting. Reddit is the 5th most visited website in the United States,  
96 has more than 330 million active users, and an average of 21 billion screen views per month  
97 [22, 23]. A primary feature of the Reddit social media platform is the existence of subreddits,  
98 moderated discussion boards with a focused topic. Subreddit discussions span a broad range

of topic areas, from politics to illicit drug use to health conditions. We focused on a subset of  
100 subreddits related to health, as determined by the number of mentions of generic/trademark  
drugs and adverse drug reactions (ADRs) contained within the subreddits. A few examples  
102 of these health oriented subreddits are ‘r/trees’, for the discussion of marijuana, ‘r/opiates’,  
for the discussion of opiates, ‘r/diabetes’, discussion of diabetes and diabetes management,  
104 and ‘r/fitness’ focusing on general fitness. A single discussion thread consists of an initiating  
user submission called a post and associated threads of user comments responding to both  
106 the initial post and to other comments.

108 The RCA data has several advantages for the purpose of identifying drug synonyms and  
misspellings compared to other previously used corpora. First, the RCA contains comments  
110 created by individuals with little or no editing (i.e. unlike Wikipedia), thus it preserves  
both spelling errors and potentially rarer semantic usage of community specific terms, such  
112 as slang. Second, the subreddit structure of Reddit, as mentioned above, offers high-level  
metadata about the likely topic of a given comment in a particular subreddit. This is compa-  
114 rable to the usage of hashtags on Twitter to denote a topic of relevance, but unlike hashtags  
which aren’t required for every individual tweet, all Reddit comments are annotated with  
116 their subreddit of origin. A recent study found the ability to filter Reddit content based  
on subreddits improved the performance of their method over the use of unfiltered Twitter  
118 data [14]. However, if metadata about users, such as age, sex, or location, is of great in-  
terest to a research effort, Twitter user profiles often contain such metadata at higher rates  
120 than Reddit. Third, the language in the RCA is informal and yields a training corpus that  
is representative of average language usage on social media. Fourth, Reddit comments are  
122 conversational and contain many individual mentions of a particular terms in context. Word  
embedding models, which rely on the distributional hypothesis, benefit from having many  
124 different contextualized examples of terms. Fifth, while Reddit has fewer users and daily  
post volumes than Twitter, Reddit only places a 10,000-character limit on comments/posts.  
126 In contrast, Twitter, limited posts to 140 characters until November 2017 and currently lim-  
its them to 280 characters [24]. Sixth, the RCA is publicly archived and fully downloadable  
128 without restrictions on data storage and sharing. This facilitates research reproducibility  
as authors can refer to the archived comment data. Although, Twitter data can be fully  
130 archived during the original research effort and shared with other researchers upon request.  
Recent independent efforts to replicate studies that used Twitter data were only able to  
132 retrieve 1,012 of the 1,784 tweets included in the original 2015 study, 57% of the original  
data set [25].

134 Our work uses the RCA, word embedding models, and automated filters to create an em-  
pirical lexicon of potential drug misspellings and synonyms. We trained a word embedding  
136 model, RedMed, on Reddit data and optimized it for the retrieval of drug synonyms. We  
used a database of known drug terms and a novel performance metric, as well as a novel  
138 word cluster pruning technique in conjunction with the model to identify candidate drug  
terms. We then filtered these candidate tokens using lexical edit-distance, phonetics, pill  
140 marks, and Google search results. We performed manual validation on a subset of these  
results and achieved an accuracy of  $\sim 0.88$ . The utility of this lexicon is demonstrated by  
142 increased yield of relevant user posts. These drug term lists represent a novel resource for

144 efforts in social media-oriented drug research.

## 2. Materials and methods

### 146 2.1. Dataset

#### 2.1.1. Reddit comment data and subreddit selection

148 Reddit comments from 2005-2018 and their associated metadata were downloaded from  
149 <https://pushshift.io> [26]. In order to maximize the ability of models to learn health-oriented  
150 semantics from the corpus, we sought to create subsets of the corpora that were enriched  
151 for health-related content by leveraging comment metadata with regards to what subreddit  
152 each comment was submitted to. This allows for the broad selection of comments that were  
153 made within subreddits dedicated to health-related topics. We selected an initial training  
154 corpus for the word embedding models by extracting all forums listed in the r/Health and  
155 r/Drugs side bars. After an initial hyperparameter optimization utilizing this corpus, we  
156 searched all comments in the RCA, regardless of the subreddit, for exact matches to generic  
157 and trademark drugs contained within DrugBank and health-related terms derived from the  
158 SIDER subset of MedDRA [27, 14, 28, 29]. This data-driven approach enabled the inclusion  
159 of a greater number of health-related subreddits that were not curated within the side bars  
160 mentioned above, such as subreddits that were recently created, were banned but archived,  
161 contained low numbers of subscribers, and/or are dedicated to more obscure health topics.  
162 We then selected the final collection of subreddits to include based on their enrichment for  
163 drug mentions per comment (i.e. number of comments within a subreddit containing a drug  
164 mention divided by the total number of comments within that subreddit). We selected an  
165 enrichment cutoff of  $1e^{-4}$ , which was the point at which the number of unique drugs captured  
166 within the corpus started to plateau.

#### 2.1.2. *de novo* phrase finding

168 The lack of a comprehensive list of consumer drug phrases necessitated the *de novo* discov-  
169 ery of phrases (e.g. word level n-grams that are enriched within the corpus). We utilized  
170 AutoPhrase [30, 31], a phrase discovery tool, to identify phrases within the initial devel-  
171 opment corpus derived from the r/Health and r/Drugs side bars. AutoPhrase requires a  
172 set of training phrases to calibrate the scoring scheme, we used 70,108 phrases contained  
173 in Wikipedia, MeSH, DrugBank, and the Consumer Health Vocabulary [32] as the training  
174 data. AutoPhrase was run without dependency parsing and phrases with a score above 0.5  
175 were utilized for corpus processing. At this stage phrases were not filtered for relevance  
176 to health or drugs, but 2,849 of these phrases contained the generic name of a drug from  
DrugBank.

#### 178 2.1.3. Corpus preprocessing

Each comment in the corpus was preprocessed using the following steps, (1) all text was  
180 normalized to lowercase, (2) text segments corresponding to a discovered phrase were joined  
181 into a single token, (3) URLs and links to other users and subreddits were removed, (4)  
182 all tokens were split on non-word characters unless they were a phrase from 2.1.2, (5) stop  
183 words were filtered from the remaining token sets (Supp. File 1). Duplicate comments were  
184 removed.



## 2.2. Word embedding model

### 2.2.1. Model training

186 A continuous bag-of-words model [20] was trained using Python 3.5 and the gensim package  
188 v2.3 [33]. We used an embedding size of 64 dimensions, a window size of 7 and a minimum  
190 count of 5. A hyperparameter optimization of the model was performed through a grid  
192 search over the negative sampling exponent parameter from -1.0 to 1.0 by steps of 0.25 [34].  
194 This resulted in the selection of 0.25 as the negative sampling exponent (default value is  
0.75). All remaining hyperparameters were set to the defaults. The model was trained for  
25 iterations, at which point the performance on the DrugBank Clustering Coefficient task,  
detailed below, had plateaued.

### 2.2.2. DBCC: DrugBank Clustering Coefficient

196 We used DrugBank to create a similarity task for word embedding model evaluation. Trade-  
mark and generic drug names were grouped based on their DrugBank identifier. The DBCC  
198 was then used to measure the relative similarity of grouped drugs versus drugs not in the  
same DrugBank group.

$$DBCC = \sum_k^j (\sum_i^k b_i - \sum_i^k h_i)$$

200 Where  $j$  is the set of all drug groups and  $k$  is the set of drugs contained within an individual  
drug group. We then sum  $b_i$ , the pairwise cosine similarities for all drugs within that drug  
202 group, and subtract  $h_i$ , the cosine similarity of a random drug within the set and a random  
drug outside the set, for an equivalent number of drug pairs to the drug pairs within the  
204 group. The sum of the difference in pairwise similarity across all drug groups is the DBCC  
score for that model. The DBCC has a high value when the vectors for trademark and generic  
206 names for a particular compound have a higher cosine similarity within the embedded space  
than random drug pairs, indicating that the model is forming semantic groupings of drugs  
208 based on their active compounds. Optimizing for compound based clustering is similar to  
optimizing groupings for synonym clustering, thus enabling better discovery of misspellings  
210 and synonyms based on cosine similarity in downstream uses of the embeddings.

### 2.2.3. Final model performance evaluation

212 We evaluated our word embedding model on the three different word pair similarity tasks.  
Word pair similarity tasks consist of comparing cosine distances of word pairs within the  
214 embedded space with some outside measure of the similarity of those two words. As it is  
desirable to have an embedded space where distances between word embeddings capture  
216 information about the relationship between those two words, with similarity being the rela-  
tionship of interest for this task. For instance, we would expect a good embedding to embed  
218 similar terms like "metastasis" and "tumor" closer to each other in the embedded space than  
less similar terms like "metastasis" and "finger".

220 The first metric is the DBCC, which evaluates the cosine similarity between generic and  
trademark terms for individual DrugBank drug entries. The second is the UMNSRS Clin-  
222 ical term pair similarity task, where 401 clinical term pairs have human curated similarity  
ranking [35]. The model similarity ranking was calculated based on the cosine similarity  
224 of the vector representations of the terms in a given pair. The third task is the MayoSRS

relatedness reference, where human relatedness rankings for 101 clinical term pairs were reported [36]. We evaluated the models based on the Spearman correlation of the human versus model rankings, as for the UMNSRS similarity task.

### 2.3. Identification of candidate tokens

Candidate tokens are tokens in the embedded space that progress to the filtering stage as potential misspellings and slang terms of known terms; we refer to the known term used to generate the list of candidate tokens as the seed term. We identified these based on cosine similarity between the vector representations of known drug terms and embedded tokens. Cosine similarity is not sufficient to define potential candidate tokens as drugs differ in their relative numbers of candidate tokens. For instance, we would expect "Marijuana", a popular recreational drug, to have more relevant candidate tokens (i.e. misspellings/slang terms) within the text, than a drug like simvastatin, which has no known recreational usage and is rarely mentioned within the corpus. Therefore, we aim to select more candidate tokens for commonly discussed drugs than for rarely mentioned ones. To determine a cosine similarity cutoff for each individual seed term we use the following method. We identified the 1,500 tokens nearest to the seed term within the embedded space, based on cosine similarity. We created noisy labels for these 1,500 tokens by labeling (1) phrase tokens, as discovered in 2.1.2, containing the seed term as positives and (2) labeling other tokens as positives or negatives, based on a term match score. Noisy labels enable us to leverage phrases and tokens that are likely misspellings or synonyms within the data to estimate an appropriate cosine cutoff using standard machine learning metrics, such as an f1-score. Tokens that had a term match score,  $f(w_i)$ , greater than 0.4 as positives, a heuristic cutoff that selects an average of 20% of the list as positives based on spot inspections of performance on a few rare and a few high frequency drugs. The remainder of the 1,500 tokens were labeled as negatives. The term match score was calculated as follows:

$$f(w_i) = jaro(w_i, t_k) \cdot \cos(\vec{w}_i, \vec{t}_k)$$

Where  $w_i$  is a candidate token contained with the 1,500 nearest tokens and  $t_k$  is the seed term used to generate the nearest-neighbor token list.  $jaro(w_i, t_k)$  is the Jaro-Winkler similarity between the  $w_i$  and  $t_k$  tokens, calculated using a prefix weight of 0.1. The Jaro-Winkler similarity is a lexical matching based measure of similarity between two strings. The prefix weight controls the relative impact of matches at the beginning of the strings versus matches made later in the string [37].  $\cos(\vec{w}_i, \vec{t}_k)$  is the cosine similarity between the two tokens' word vectors. The term match scoring function aimed to balance lexical and semantic similarity of two tokens. The nearest-neighbor cosine similarity cutoff used for pruning for that seed term was then determined by maximizing the f1-score over the noisy labels. Precision and recall values were calculated using the noisy positive and negative labels defined above. Any phrase in the nearest 1,500 tokens that contained an exact match to a known drug term was also included in the set of candidate tokens. This process resulted in a set of candidate tokens, derived from the pruned list of nearest neighbors, and mapped to a seed term, the known drug that served as the clustering centroid. A generic drug was then linked to the union of the clusters for each seed term within that generic drug's set of associated known drug terms (AKDTs). The set of AKDTs contains all the seed terms for a particular

266 generic drug, based on their DrugBank identifier, for instance the AKDTs for oxycodone  
would contain oxycodone, oxycontin and oxy ir, as well as the other trademark names for  
268 oxycodone formulations. The resulting set of candidate terms for oxycodone would be the  
union of the candidate token sets of the AKDTs for that generic.

#### 270 *2.4. Automated filtering*

We compared candidate tokens to their AKDTs. The filtration pipeline is sequential, thus  
272 a candidate token that is selected for inclusion in the final term list by an earlier filter is  
removed from the candidate pool at that stage of the process and not seen by downstream fil-  
274 ters. Filtration consists of the following components: comparisons between candidate tokens  
and their AKDTs using lexical and phonetic metrics (2.4.1, 2.4.2, 2.4.5), lexical comparison  
276 to a pill impression database (2.4.3), and the term set intersections between the AKDTs and  
terms that appear in top 10 results from a Google search for the candidate token (2.4.4).

##### 278 *2.4.1. Edit distance*

We computed the edit distance between each candidate token and AKDTs using python-  
280 Levenshtein v0.12.0. We included candidate tokens that were within 2 edits of a term in  
their AKDTs in the final term list.

##### 282 *2.4.2. Partial phonetic and edit distance*

We compared the phonetic symbols, derived from the Metaphone algorithm [38], for the  
284 first 3 letters of a candidate token to terms in their AKDTs. We then compared candidate  
tokens with exact matches for the first three phonetic characters to their AKDTs based on  
286 normalized edit distance. We included those with a normalized edit distance less than 0.5  
in the final term list.

##### 288 *2.4.3. Pill impressions*

Pill impressions are the markings made on many pills and tablets by the manufacturer.  
290 We compared candidate tokens that were between 1 and 6 characters to pill impressions in  
the National Drug Codes List. A list of drugs with pill impressions exactly matching the  
292 candidate token was intersected with the AKDTs. Candidate tokens with any set intersection  
were included in the final term list. We found the National Drug Codes List, to be incomplete,  
294 thus if an exact pill impression hit was not found in the National Drug Codes List, the  
drugs.com pill identifier service was queried, and the list of drugs captured in the search  
296 list was cross-referenced as noted above and candidate tokens that were a direct match were  
included in the final term list.

##### 298 *2.4.4. Google search*

We registered a Google Custom Search API (<https://developers.google.com/custom-search/>)  
300 and queried candidate tokens through it. We used the top 10 search results to evaluate the  
candidate token, preprocessing the text content of the title and preview snippets in the  
302 same way as the Reddit comment data (2.1.3). We intersected the resulting token set with  
the AKDTs in the candidate token's generic group. Candidate tokens with at least one  
304 intersecting term were included in the final term list.



#### 2.4.5. Edit distance for low count words

306 We compared tokens that were captured at the candidate token stage and had less than  
308 30 mentions against all AKDTs sets for lexical similarity. Low count tokens receive special  
310 treatment, as they are more difficult to get proper embeddings for, since by definition the  
312 corpus contains few contextual examples from which to learn an embedding. Tokens that  
met the edit distance criteria in 2.4.1 were remapped to the associated seed term and were  
included in the final term list. In the case of multiple matches, the token was mapped to  
the AKDT set with the lowest edit distance.

#### 2.5. Human rater validation

314 We gave a random sample of 74 terms derived from 14 seed words there were a subset  
of 6 generic drug groupings, captured at the candidate term identification stage (2.3), to  
316 a group of 12 raters. We presented raters with the associated seed term, the candidate  
token, and 3 examples of the candidate token being used within Reddit comments. We  
318 asked raters to classify the candidate token with a first label, as known (i.e. an exact match  
to a drug entity in DrugBank), misspelling, synonym, or negative and with a second label  
320 as an exact reference to, related to, or unrelated to the associated seed term. For instance,  
given the seed term "percocet" the first label work as follows: the phrase "taking\_percocets"  
322 would be labeled as known, "pecocet" would be labeled as a misspelling, "percs" would be  
a synonym, and "10mg\_pills" and "sidewalk" would be labeled as a negative. The second  
324 label for "10mg\_pills" would be labeled as related, while "sidewalk" would be labeled as  
unrelated and the remaining examples would be labeled as exact. The related and unrelated  
326 classifications were collapsed and designated as non-exact after the rating task was complete.  
The inter-rater reliability on this 74-term set was used to select a subset of 5 raters with  
328 acceptable levels of agreement. Fleiss'  $\kappa$  was  $\sim 0.7$  for the term type classification task and  
 $\sim 0.7$  for the relatedness task [39, 40, 41]. These 5 raters individually classified an additional  
330 849 terms derived from 28 seed words that were a subset of 8 generic drug groupings resulting  
in a total of 923 human annotated candidate tokens. We created the automated labels as  
332 follows, edit distance (2.4.1) and the phonetic misspellings (2.4.2) were combined into the  
"misspelling" category, the pill mark (2.4.3), and Google search (2.4.4) were combined into  
334 the "synonyms" category and candidate tokens that were not validated by the automatic  
methods were designated as "other". We labeled the human annotated terms that were  
336 classified as exact references to the associated seed term as the class they were annotated  
to and all inexact terms were labeled as "negative". Performance metrics for the automated  
338 classification were calculated by comparing the human and automated labels (Fig. 3).

### 3. Results

#### 3.1. Subreddit filtering

340 The combination of subreddits listed in the r/Health and r/Drugs side bars resulted in  
342 185 subreddits (Supp. File 2) and contained more than 25 million comments. We filtered  
subreddits based on their medical content enrichment, as described in 2.1.1. The final  
344 working corpus was all comments made within the subset of subreddits that had an overall  
comment enrichment above a cutoff of  $1e^{-4}$ . This resulted in a corpus of more than 500  
346 million comments over 2,500 subreddits (Supp. File 3).

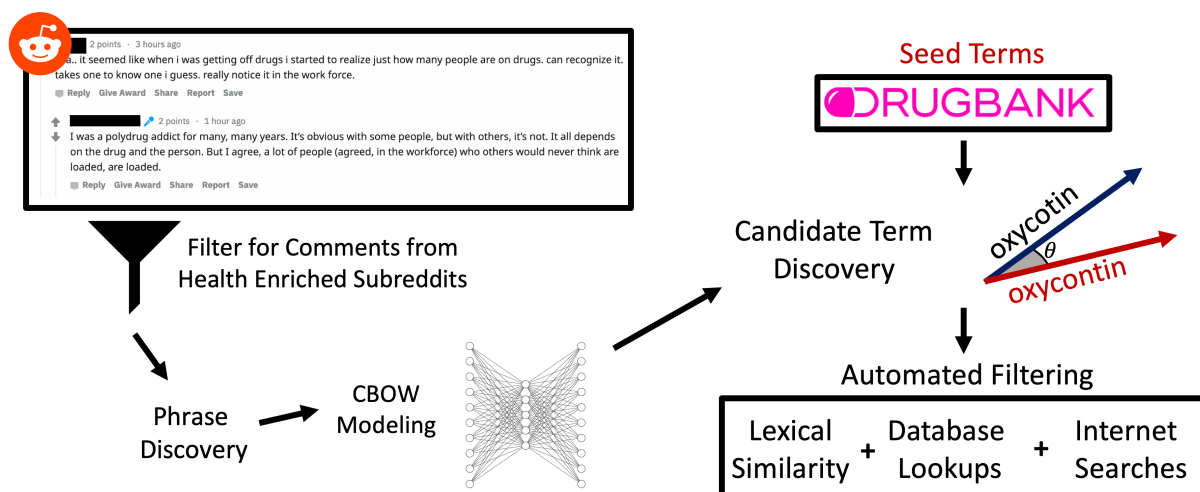

Figure 1: Overview of embedding pipeline. Reddit comments are first filtered based on subreddit for those that contain health related content. The resulting corpus is used for phrase discovery, preprocessed, and used to train a word embedding model. Seed drug terms from DrugBank are used to identify candidate tokens based on their cosine distance to these seed terms. Candidate tokens are then passed through a series of automated filters to yield the final term set.

### 3.2. Word embedding model comparison

348 We compared the performance of our final Reddit model against 13 publicly available word  
vector models using various embedding algorithms and corpora [42, 43, 44, 45]. Some words  
350 were not represented in the vectorized models (i.e. out-of-vocabulary error), for some of the  
word pairs in the similarity evaluation task. Nonetheless, we first evaluated all 13 models  
352 individually based on the subset of terms that were within the vocabulary of that model  
(Table 1). We also evaluated the top performing models from the first evaluation based on  
354 the subset of term pairs that were within the vocabulary of all those models, to improve  
interpretation of the results (Table 2). The Reddit model consistently performs best on the  
356 DBCC task, while achieving close to top performance on the UMNSRS task (Table 1 and  
Table 2). Other models outperform the Reddit model on the MayoSRS task.

358 To evaluate the drug term embeddings within the Reddit model we utilized T-SNE [46] to  
360 generate a low dimensional representation of a subset of drugs that have a code designation  
within the Anatomical Therapeutic Chemical (ATC) Classification System (Figure 2). We  
362 visually observe some clustering of sex hormones (G03), antineoplastic agents (L01), and  
analgesics (N02). The distribution of psycholeptics (N05) and psychoanaleptics (N06) drug  
364 classes are broadly overlapping.

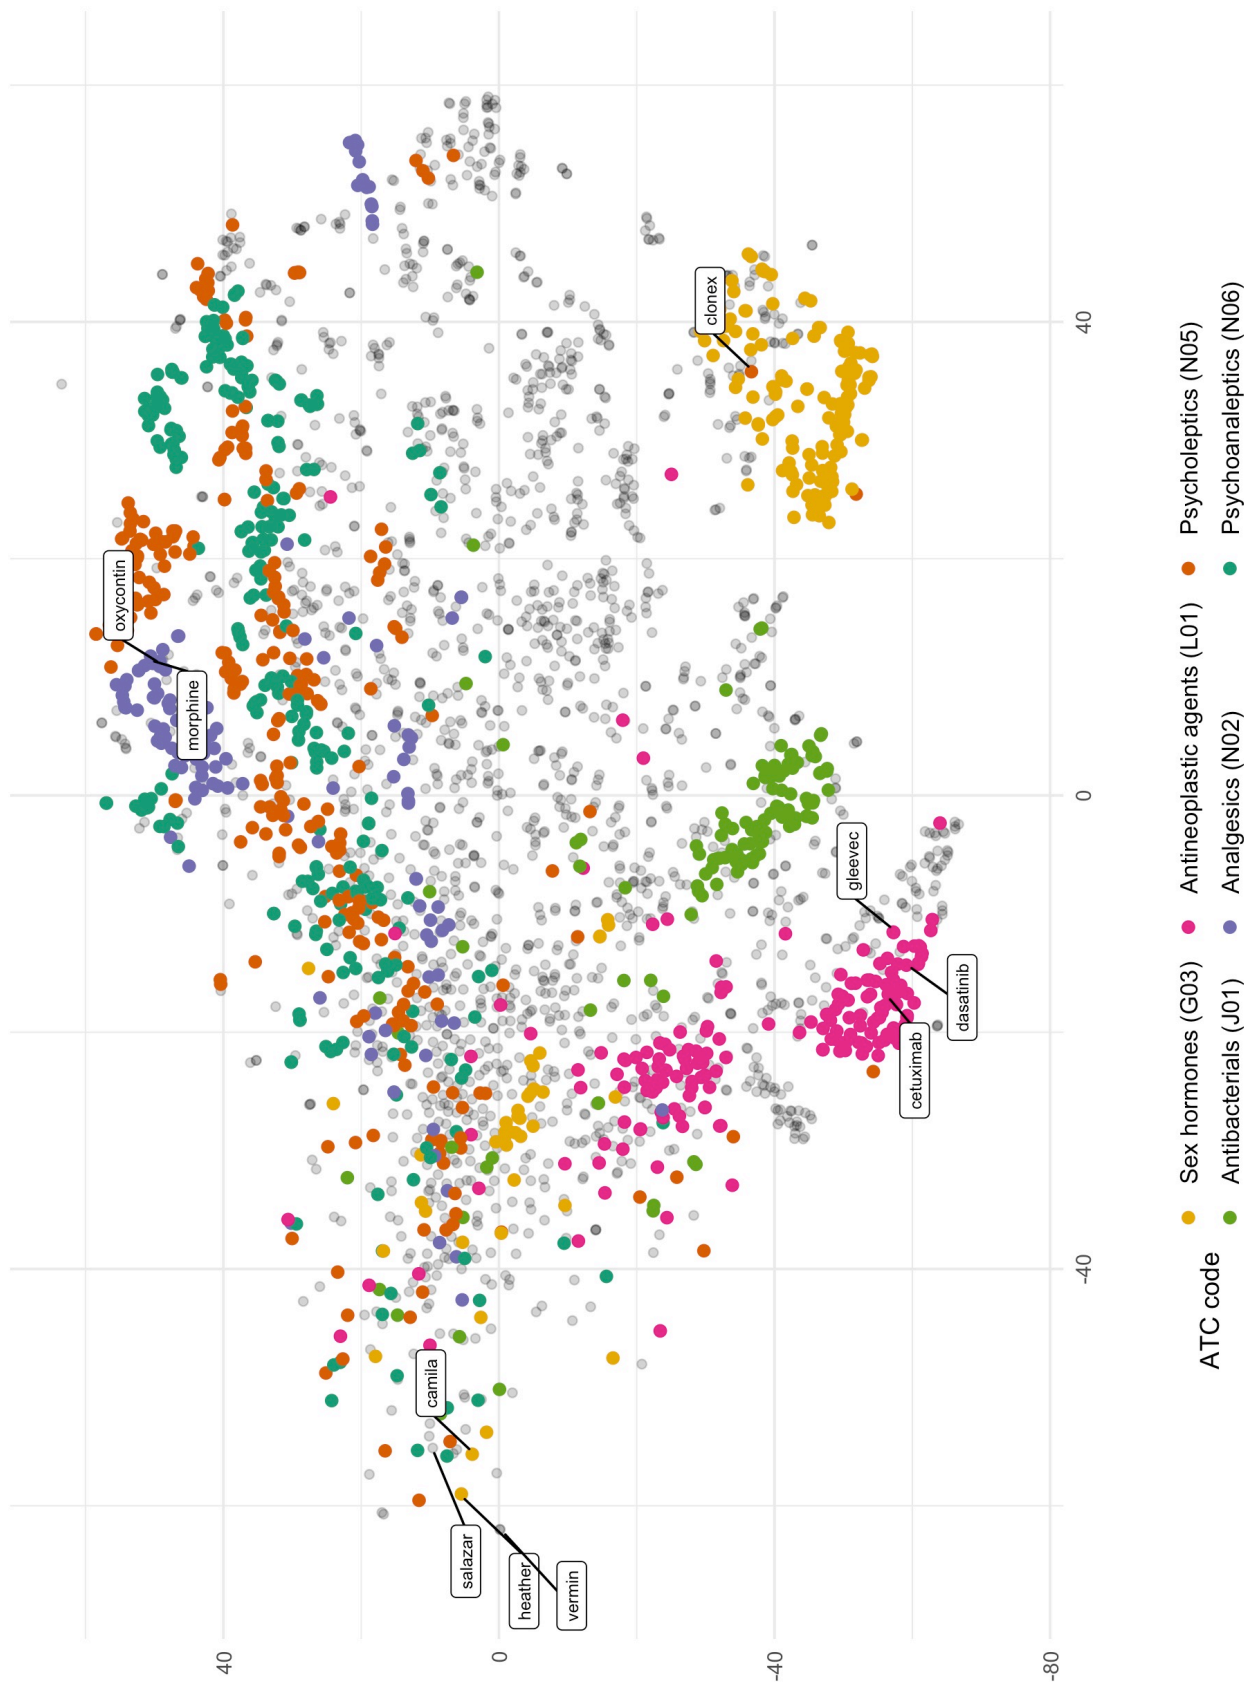

Figure 2: T-SNE visualization of Reddit word embedding space for the subset of drugs with ATC codes. Demonstrates nearness of vectors of drugs within the same ATC drug class in the embedded space. Antineoplastic agents (pink), sex hormones (yellow), and antibacterials (green), some of the larger drug classes, demonstrate closeness within and distance between drug classes in the embedded space. Clustering of drugs within the same therapeutic class indicates that learned representations are capturing drug semantics. Overlapping of psycholeptics (orange) and psychoanaleptics (teal) is a result of the similarity of the therapeutic goal of both drug classes, which is to produce calming effects.

| Model     | # DBPairs | DBCC         | # Clin Pairs | Clin $\rho$  | # Mayo Pairs | Mayo $\rho$  | Dim | Corpus              | Source |
|-----------|-----------|--------------|--------------|--------------|--------------|--------------|-----|---------------------|--------|
| CBOw      | 841       | <b>0.334</b> | 353          | 0.645        | 77           | 0.441        | 64  | reddit              | RedMed |
| fastText  | 1639      | 0.134        | 350          | <b>0.696</b> | 38           | <b>0.613</b> | 200 | pubmed + MIMIC      | [42]   |
| Skip-Gram | 627       | 0.199        | 343          | 0.655        | 36           | 0.498        | 200 | pubmed              | [43]   |
| Skip-Gram | 712       | 0.183        | 345          | 0.651        | 36           | 0.432        | 200 | pubmed + PMC        | [43]   |
| Skip-Gram | 735       | 0.158        | 345          | 0.637        | 36           | 0.36         | 200 | wiki + pubmed + PMC | [43]   |
| GloVe     | 162       | 0.076        | 231          | 0.421        | 26           | 0.214        | 50  | wiki + gigaword     | [44]   |
| GloVe     | 162       | 0.076        | 231          | 0.384        | 26           | 0.174        | 100 | wiki + gigaword     | [44]   |
| GloVe     | 162       | 0.073        | 231          | 0.462        | 26           | 0.185        | 200 | wiki + gigaword     | [44]   |
| GloVe     | 162       | 0.077        | 231          | 0.439        | 26           | 0.242        | 300 | wiki + gigaword     | [44]   |
| GloVe     | 99        | 0.076        | 94           | 0.165        | 12           | 0.392        | 25  | twitter             | [44]   |
| GloVe     | 99        | 0.094        | 94           | 0.242        | 12           | 0.371        | 50  | twitter             | [44]   |
| GloVe     | 99        | 0.073        | 94           | 0.267        | 12           | 0.389        | 100 | twitter             | [44]   |
| GloVe     | 99        | 0.061        | 94           | 0.255        | 12           | 0.466        | 200 | twitter             | [44]   |
| Skip-Gram | 179       | 0.035        | 294          | 0.462        | 54           | 0.149        | 300 | google news         | [45]   |

Table 1: Comparison of Reddit word embedding model to publicly available word embedding models, for per model in-vocabulary term pairs. **# DBPairs** is the number of generic drug groupings, for which there were at least 2 drugs captured by the model. **DBCC** is the DBCC score for that model. **# Clin Pairs** and **# Mayo Pairs** is the number of captured, both terms in the term pair were present in the model, for the UMNSRS Clinical term pairs and MayoSRS term pairs, respectively. **Clin  $\rho$**  and **Mayo  $\rho$**  are the Spearman correlations between the model based similarity ranking and the human similarity rankings for the UMNSRS and MayoSRS tasks, respectively. **Dim** is the length of the word vectors for that model. **Corpus** is a brief indication of the corpus(es) used to train the model. **Source** provides a reference for the work from which each model was derived. The Reddit model was the top performing model for the DBCC task. The fastText model trained on PubMed and MIMIC data was the top performing model for the UMNSRS (Clin) and MayoSRS (Mayo) tasks.

| Model     | # DBPairs | DBCC         | # Clin Pairs | Clin $\rho$  | # Mayo Pairs | Mayo $\rho$ | Dim | Corpus              | Source |
|-----------|-----------|--------------|--------------|--------------|--------------|-------------|-----|---------------------|--------|
| CBOw      | 279       | <b>0.181</b> | 327          | 0.643        | 35           | 0.301       | 64  | reddit              | RedMed |
| fastText  | 279       | 0.179        | 327          | <b>0.721</b> | 35           | <b>0.63</b> | 200 | pubmed + MIMIC      | [42]   |
| Skip-Gram | 279       | 0.177        | 327          | 0.673        | 35           | 0.504       | 200 | pubmed              | [43]   |
| Skip-Gram | 279       | 0.176        | 327          | 0.655        | 35           | 0.38        | 200 | wiki + pubmed + PMC | [43]   |
| Skip-Gram | 279       | 0.162        | 327          | 0.667        | 35           | 0.444       | 200 | pubmed + PMC        | [43]   |

Table 2: Comparison of Reddit word embedding model to publicly available word embedding models, for a shared subset of term pairs. For a description of columns see Table 1. The Reddit model was the top performing model for the DBCC task, but the overall DBCC model performance was tighter. The fastText model was the top performing model for the Clin (UMNSRS) and Mayo (MayoSRS) tasks.

### 3.3. Automated validation

366 Table 3 shows examples of the automated classification categories. We evaluated the clas-  
 368 sifications made by the automated filtering pipeline against human annotations (Figure 3).  
 370 The classification accuracy was 0.88 across the 4 classes, with specificity of greater than or  
 equal to 0.90 across all term classes (Table 4). Sensitivity was high (>0.85) for the known,  
 misspelling, and negative classifications, but low for the synonym class.

| generic    | phrases                 | misspelling     | pill marks   | synonym                    |
|------------|-------------------------|-----------------|--------------|----------------------------|
| alprazolam | xanax_addiction (0.59)  | zanax (0.62)    | g3722 (0.69) | green_hulks (0.71)         |
| oxycodone  | 80mg_oxy (0.84)         | percaset (0.75) | m523 (0.69)  | 30mg_blues (0.81)          |
| marijuana  | cannabis_indica (0.59)  | cannibis (0.85) | -            | indica_heavy_strain (0.52) |
| cocaine    | buy_pure_cocaine (0.28) | cocane (0.71)   | -            | c17h21no4 (0.67)           |

Table 3: Examples of discovered terms and phrases with cosine similarity to the generic term indicated. **Phrases** consists of tokens that contained exact matches to known trademark or generic drug names, and **misspellings** are errors in the spelling of those terms. **Pill marks** were short tokens that matched an entry within a pill impression database. **Synonyms** are candidate tokens whose Google search results contained the associated known drug. Discovered phrases capture relevant information about the drug of interest, such as drug abuse, variation of drug forms (i.e. dosage, strains), and desired attributes (i.e. purity). The misspellings capture both phonetic and lexical errors. Drugs that are primarily delivered in a pill form were sometimes referenced by their pill impressions. Synonym based references to drugs that contain limited lexical similarity to the trademark and generic drug names would likely be missed without semantic information.

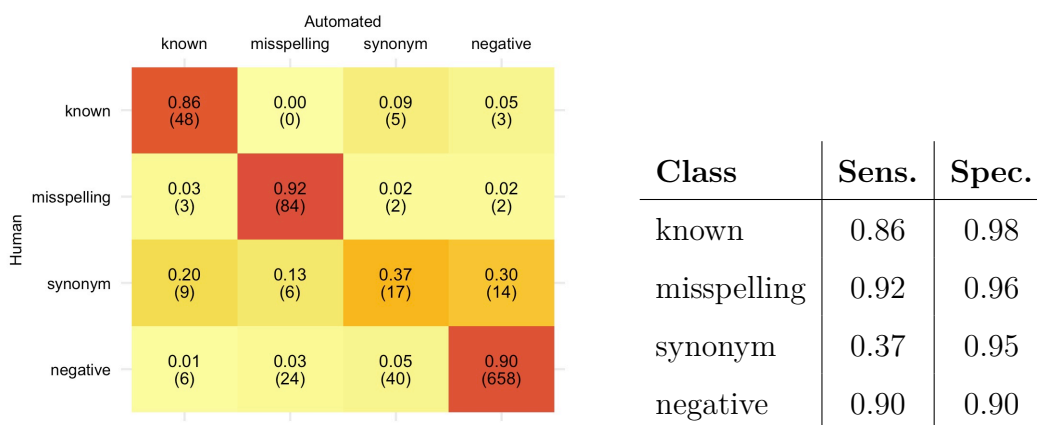

Figure 3: Confusion matrix of human vs. automated validation of candidate token mappings. The five internally consistent human annotators had a high level of agreement with the automated validation pipeline classifications for all term categories except synonyms.

Table 4: Sensitivity and specificity for individual term classes. All four classes had high specificity and the known, misspelling, and negative classes had high sensitivity.

### 3.4. Proportions of term mentions by class

372 We searched all publicly available Reddit comments, from 2005-2018, and counted the num-  
 ber of mentions of each term in the discovered term sets. We calculated the proportion of



374 terms for each drug that belonged to each of the 4 classification categories. A subset of drugs  
and their term proportion breakdowns are presented in Figure 4. Out of all mentions, an  
376 average of 79% ( $\pm 0.54\%$ ) were known, 14% ( $\pm 0.47\%$ ) were misspellings, 6.4% ( $\pm 0.34\%$ )  
were synonyms, and 0.13% ( $\pm 0.054\%$ ) were pill marks.

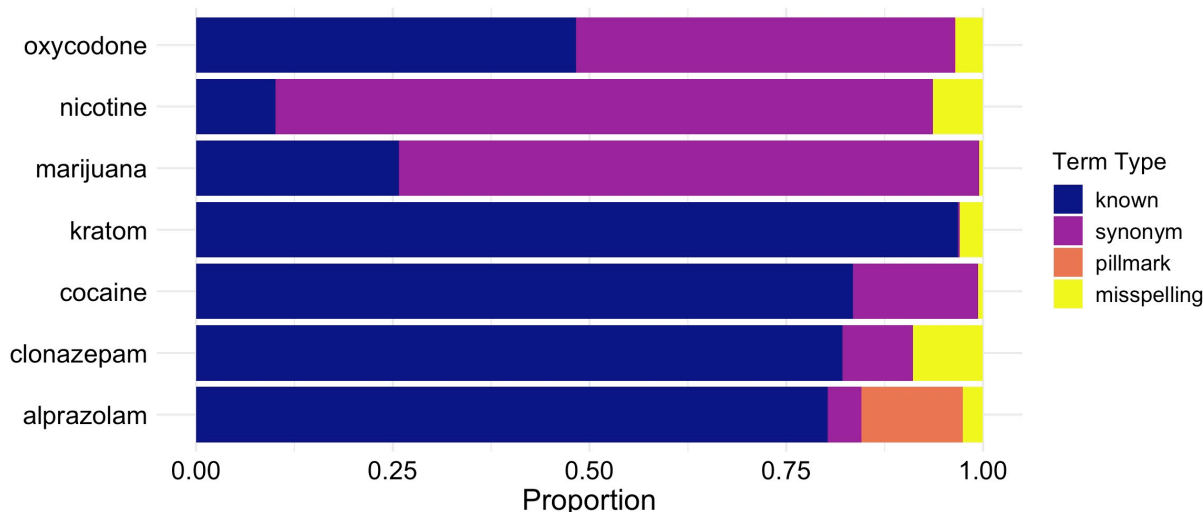

Figure 4: Proportion of all term mentions derived from each of the term types for an exemplary set of seven seed terms. Reddit comment term counts for 2005-2018 were generated for drug terms included in the final term lists. Different term types contribute varying proportions of the overall mentions of a particular drug, with synonyms and misspellings contributing notable proportions of observations. If a search used only known terms as defined by DrugBank drug entries, only the known proportion would be recovered.

## 378 4. Discussion

In this work, we present both a word embedding model trained on a medically enriched  
380 subset of Reddit comments and a set of drug misspellings and slang terms derived from that  
model. We leveraged edit-distance metrics, existing drug databases, and internet searches  
382 to filter candidate tokens in a sequential process (Figure 1).

384 Although there are several published word embedding models, there were a few reasons we  
needed to train our own. First, many publicly available word-embedding models were trained  
386 on expert generated corpora, such as PubMed, where the underlying semantics, vocabulary,  
and syntax would be quite different from that found in social media [47]. So while these  
388 models might be able to identify synonyms and even misspellings in the expert domain,  
these are expert synonyms and misspellings not those of the general public. We used Red-  
390 dit comments to ensure that we captured misspellings and synonym terms, such as slang,  
that are likely to be unique to social media data. Second, the process through which the  
392 data was prepared for these models tries to limit the vocabulary size through preprocessing  
steps that would have explicitly removed the types of lexical variation we were interested  
394 in, such as misspellings. Even if the preprocessing steps for these models did not explic-  
itly exclude or correct misspellings, many sources of expert text undergo multiple rounds  
396 of revisions that aim to remove these types of errors from the text. Third, only unigrams

or subwords were embedded, while this works for many downstream modeling applications,  
398 it would have limited our ability to discover phrases. Phrases are necessary for identifying  
particular drug synonyms (e.g. “nose\_candy”, a slang reference to “cocaine”). Our usage  
400 of AutoPhase enabled us to embed these phrases and make them discoverable within the  
RedMed model. Fourth, models trained on social media data, such as Twitter, that might  
402 capture semantic meanings of interest were not enriched for health-related data and thus  
lacked the majority of drug terms we were interested in. This is primarily due to the rarity of  
404 drug mentions within a general social media corpus. Through the selection of specific health-  
related subreddits we were able to train a social media word embedding model that contains  
406 many drugs and other health-related entities of potential interest to the research community.

408 All three term-pair similarity tasks used to evaluate the word embedding models were de-  
fined by medical terminology experts, either database curators or clinicians. Given that our  
410 Reddit corpus was derived from comments generated by the general public in an informal  
setting, we would expect our model to be at a disadvantage for these tasks [47, 48]. The  
412 model performance comparison (Table 1 and Table 2) show that despite our model being  
trained on this layperson corpus, it achieved competitive performance on the UMNSRS task.  
414 The RedMed model also outperforms other models on the DBCC task, a somewhat expected  
result as the DBCC task was used to evaluate hyperparameter settings for our model. Even  
416 though other publicly available models outperformed our model on these term-pair similarity  
tasks, the other publicly available models were poorly suited for our end goal of misspelling  
418 and synonym identification. Thus, our model is performing competitively on the similarity-  
based tasks despite being trained on the Reddit corpus.

420 We evaluated the RedMed model based on evaluation task labels defined by experts, yet  
422 using cosine similarity to a seed term we were able to retrieve relevant candidate terms that  
include misspellings, slang terms, and pill marks. We find the overall effectiveness of these  
424 retrievals to be somewhat surprising. In order for the vector representations to be similar  
the modeling process requires the words surrounding the known and generic drug names to  
426 be similar to the words surrounding the candidate terms within the corpus. For instance  
the cosine similarity between drug names and their slang terms is quite high, even though  
428 we might expect the context surrounding the usage of a proper drug name to differ from  
the context surrounding a slang term. Users discussing drug abuse might rely more on slang  
430 terms and pill marks, with users sharing a pharmacotherapy experience might be more likely  
to use the proper name for a drug. Our results indicate that there is enough context over-  
432 lap between these terms for the model to capture that slang terms are indeed references to  
generic and trademark drugs. On the other hand, we would expect the context to be similar  
434 for a drug and many of its misspellings, thus the ability to recover misspellings from the  
drug name seed words isn’t as surprising and has been used by other groups [18].

436 The T-SNE visualization offers more evidence of the drug similarities captured by the model  
438 (Figure 2). We see tight clustering of particular drug classes, such as antineoplastic agents,  
sex hormones, and antibacterial agents. We view this as further demonstration that the  
440 RedMed model is capturing relevant information about drugs. The distribution of psycholep-  
tics and psychoanaleptics drug classes within the embedded space is overlapping, potentially

442 a result of their shared targeting of psychological phenotypes.

444 Although, we evaluated the RedMed model on our target task of drug entity identifica-  
446 tion, exploration of the embedded space yields other concepts that would likely be of  
448 interest to public health researchers. For example, looking at terms clustering around  
“kratom”, a legal opioid receptor family agonist, reveals terms such as “kratom\_addiction”,  
“maeng\_da\_kratom”, and “previous\_opiate\_addiction”. The safety of kratom is currently  
450 being actively evaluated by the FDA and even this small list of neighboring terms hints at  
a few potential directions for investigating kratom within the public sphere [49].

452 Our inclusion of phrases in the embedding model was a critical component of this effort, as  
phrases were necessary for identifying particular slang, such as “green\_hulks”, that could  
454 not have been identified from the individual tokens (Figure 3). We allowed misspellings and  
other unknown English words to remain within the corpus through the preprocessing stage.  
456 We were able to leverage both phrases and misspellings as noisy true positives during the  
candidate term search process (2.3), a crucial component of our pipeline. Additionally, the  
458 decision to not limit the corpus to known English words enabled the discovery of methods  
of referencing drugs we were not expecting, such as pill marks. Given that internet forums  
460 contain discussions between individuals at various stages of drug use or abuse, referencing  
pill marks is a specific means of identifying a particular drug and pill marks allow for drug  
462 identification long after pills may have been removed from their original containers.

464 The labels we derived from our filtration process achieved high accuracy across the cate-  
gories for which we saw high human inter-rater agreement, “known”, “misspellings”, and  
466 “negative”. For the assignment of a “known” label, our pipeline performs a database lookup  
and performance primarily relies on the completeness of the database. A misspelling label  
468 is assigned based on edit-distance, so primary sources of error are misspellings outside the  
edit-distance cut-off. We addressed this by allowing a greater edit-distance if the prefix of  
470 the word was phonetically identical to the drug to which it was mapped. “negative” was  
assigned to a term if the above metrics were not satisfied and Google search results did not  
472 contain any mentions. We selected Google search as the final validation metric, as we viewed  
it as mirroring what a human annotator might do for difficult cases. Of course, there are  
474 additional nuances in the search results with regards to the specificity of the search term  
that a human might recognize that our filtration process missed.

476  
478 Approximately 14% of all drug mentions captured by our term sets were misspellings, this is  
consistent with a smaller scale study of drug misspellings where Jiang et al. investigated 6  
480 drugs and found around 10% of mentions were misspellings, with higher rates for drugs like  
codeine and ibuprofen [15]. Misspellings combined with slang terms account for about 20%  
482 of the overall mentions. Therefore, social media data collection activities that rely explicitly  
on exact matches are potentially introducing a large bias into the dataset. For some drugs  
the problem maybe worse; for instance, while there were 1,812,032 mentions of “marijuana”  
484 on Reddit from 2005-2018, there were 5,223,134 mentions of “weed”. While researchers might  
know to include “weed” in their searches for marijuana posts, other slang terms may not  
486 be as obvious to researchers and may represent a large proportion or even a majority of the

mentions.

488

Our ability to identify drug misspellings and synonyms was limited by the overall levels  
490 of discussion of particular drugs on the platform. We cannot effectively identify drug mis-  
spellings and synonyms for drugs that have few or no mentions within our dataset. This  
492 results in relatively few terms for low word count drugs, such as simvastatin. Generally,  
we still manage to find a few common misspellings and have good coverage of commonly  
494 discussed drug.

496 Some low frequency misspellings and synonym terms were clustered with a different drug  
than they were actually referencing, resulting in those terms being missed by our approach.  
498 For example, "dillaudid", a misspelling of the trademark drug "dilaudid" clustered close to  
"oxycodone" in the embedded space, even though the generic form of "dilaudid" is hydro-  
500 morphone. We addressed this issue by allowing low count terms, which are more likely to  
have poor quality embeddings, to be remapped based on our misspelling metrics. Even with  
502 this additional step it is unlikely we were unable to fully recover all misspellings. We also  
note that drug names with alternate meanings outside of the drug context, appear further  
504 from their drug classes within the embedded space. The trademark drug names "Salazar"  
and "Camila" are examples of this effect, as they likely primarily refer to people rather than  
506 trademark drugs. This resulted in the vector representations of these drugs that were dif-  
ferent than those of other drugs in the embedded space and may have added noise to the  
508 clustering process.

510 Our Google search validation is limited by false negatives when the primary meaning of a  
candidate token differed from its usage on Reddit. For example, "real\_coke", which refers  
512 to real cocaine on Reddit is primarily associated with a soft drink in Google search results.  
Additionally, Google searches yielded false positives when search results for a relatively gen-  
514 eral token, such as "painkillers", returned a reference to the mapped drug in question.

516 Our term counts were calculated across all comments in the comment archive, without  
considering the context in which the term was mentioned. While the majority of tokens  
518 were not polysemous, certain terms may have suffered from polysemy and thus potentially  
increased counts with irrelevant mentions. Additionally, our lexicon based approach does not  
520 incorporate any information about context and is primarily intended as a means of retrieving  
data in a keyword search research setting and/or as a means of distant supervision for training  
522 more context aware named entity recognition models.

## 5. Conclusions

524 We present the RedMed model and lexicon, providing an empirical study of drug misspellings  
and synonym usage in Reddit comment data. We trained the RedMed word embedding  
526 model specifically for the task of investigating health-related entities in social media. Al-  
though our model is trained on non-technical documents, it performs well on several bench-  
528 mark medical similarity tasks. We used our method to identify drug misspellings and syn-  
onyms. Using the resulting term sets we derived empirical estimates for the rate of mis-

530 spellings and synonyms usage based on ~3,000 drugs. The RedMed lexicon provides an im-  
531 proved set of search terms for drug-related analysis of social media data (Supp. File 4). Our  
532 RedMed model and lexicon are available on Zenodo (<https://zenodo.org/record/3238718>).  
533 Additionally, a python package for text analysis in accordance with our lexicon is available  
534 at <https://github.com/alavertu/redmed.git>.

### 536 **Declaration of Competing Interest**

The authors have no conflicts of interest.

### 538 **Acknowledgements**

We'd like to thank the editorial staff and the reviewers for their excellent feedback dur-  
540 ing the publishing process. This work was supported by the National Science Foundation  
541 [DGE – 1656518], National Institutes of Health [R24GM61374, R24GM115264, GM102365,  
542 LM05652] and the Food and Drug Administration [U01FD004979].



## References

- 544 [1] A. Sarker, R. Ginn, A. Nikfarjam, K. O'Connor, K. Smith, S. Jayaraman, T. Upadhaya,  
546 G. Gonzalez, Utilizing social media data for pharmacovigilance: A review., *Journal of  
biomedical informatics* 54 (2015) 202–212. doi:10.1016/j.jbi.2015.02.004.
- [2] S. Gottlieb, FDA statement (2018).  
548 URL <http://www.webcitation.org/78skbUCXr>
- [3] RADARS System.  
550 URL <https://www.radars.org/>
- [4] National Institute on Drug Abuse, National Drug Early Warning System (NDEWS)  
552 (2019).  
URL [https://www.drugabuse.gov/related-topics/trends-statistics/  
554 national-drug-early-warning-system-ndews](https://www.drugabuse.gov/related-topics/trends-statistics/national-drug-early-warning-system-ndews)
- [5] Pew Research Center, Social Media Fact Sheet (2018).  
556 URL <https://www.pewinternet.org/fact-sheet/social-media/>
- [6] C. L. Hanson, B. Cannon, S. Burton, C. Giraud-Carrier, An exploration of social circles  
558 and prescription drug abuse through twitter, *J Med Internet Res* 15 (9) (2013) e189.  
doi:10.2196/jmir.2741.  
560 URL <http://www.ncbi.nlm.nih.gov/pubmed/24014109>
- [7] C. C. Freifeld, J. S. Brownstein, C. M. Menone, W. Bao, R. Filice, T. Kass-Hout,  
562 N. Dasgupta, Digital drug safety surveillance: monitoring pharmaceutical products in  
twitter., *Drug safety* 37 (5) (2014) 343–350. doi:10.1007/s40264-014-0155-x.
- [8] A. Nikfarjam, A. Sarker, K. O'Connor, R. Ginn, G. Gonzalez, Pharmacovigilance from  
564 social media: mining adverse drug reaction mentions using sequence labeling with word  
embedding cluster features, *Journal of the American Medical Informatics Association* :  
566 *JAMIA* 22 (3) (2015) 671–681. doi:10.1093/jamia/ocu041.  
568 URL <https://www.ncbi.nlm.nih.gov/pubmed/25755127>
- [9] P. Carbonell, M. A. Mayer, A. Bravo, Exploring brand-name drug mentions on Twitter  
570 for pharmacovigilance., *Studies in health technology and informatics* 210 (2015) 55–59.
- [10] J. Kalyanam, T. Katsuki, G. R. Lanckriet, T. K. Mackey, Exploring trends of non-  
572 medical use of prescription drugs and polydrug abuse in the twittersphere using un-  
supervised machine learning, *Addictive Behaviors* 65 (2017) 289 – 295. doi:<https://doi.org/10.1016/j.addbeh.2016.08.019>.  
574 URL <http://www.sciencedirect.com/science/article/pii/S0306460316302994>
- [11] A. Park, M. Conway, Tracking Health Related Discussions on Reddit for Public Health  
576 Applications, *AMIA ... Annual Symposium proceedings. AMIA Symposium 2017* (2018)  
578 1362–1371.  
URL <https://www.ncbi.nlm.nih.gov/pubmed/29854205>

- 580 [12] A. Nikfarjam, G. H. Gonzalez, Pattern mining for extraction of mentions of Adverse  
Drug Reactions from user comments, AMIA ... Annual Symposium proceedings. AMIA  
582 Symposium 2011 (2011) 1019–1026.  
URL <https://www.ncbi.nlm.nih.gov/pubmed/22195162>
- 584 [13] S. S. Simpson, N. Adams, C. M. Brugman, T. J. Conners, Detecting Novel and Emerging  
Drug Terms Using Natural Language Processing: A Social Media Corpus Study, JMIR  
586 Public Health Surveill 4 (1) (2018) e2. doi:10.2196/publichealth.7726.
- [14] N. Adams, E. E. Artigiani, E. D. Wish, Choosing Your Platform for Social Media  
588 Drug Research and Improving Your Keyword Filter List, Journal of Drug Issues (2019)  
0022042619833911doi:10.1177/0022042619833911.
- 590 [15] K. Jiang, T. Chen, L. Huang, R. A. Calix, G. R. Bernard, A Data-Driven Method of  
Discovering Misspellings of Medication Names on Twitter, Studies in health technology  
592 and informatics 247 (2018) 136–140.  
URL <https://www.ncbi.nlm.nih.gov/pubmed/29677938>
- 594 [16] T. Baldwin, P. Cook, M. Lui, A. MacKinlay, L. Wang, How Noisy Social Media Text,  
How Diffrent Social Media Sources?, in: Proceedings of the Sixth International Joint  
596 Conference on Natural Language Processing, Asian Federation of Natural Language  
Processing, Nagoya, Japan, 2013, pp. 356–364.  
598 URL <https://www.aclweb.org/anthology/I13-1041>
- [17] P. Pimpalkhute, A. Patki, A. Nikfarjam, G. Gonzalez, Phonetic spelling filter for key-  
600 word selection in drug mention mining from social media, AMIA Summits on Transla-  
tional Science Proceedings 2014 (2014) 90.
- 602 [18] A. Sarker, G. Gonzalez-Hernandez, An unsupervised and customizable misspelling gener-  
ator for mining noisy health-related text sources, Journal of Biomedical Informatics  
604 88 (2018) 98–107. doi:<https://doi.org/10.1016/j.jbi.2018.11.007>.  
URL <http://www.sciencedirect.com/science/article/pii/S1532046418302168>
- 606 [19] A. Sarker, G. Gonzalez, A corpus for mining drug-related knowledge from Twit-  
ter chatter: Language models and their utilities, Data in Brief 10 (2017) 122–131.  
608 doi:<https://doi.org/10.1016/j.dib.2016.11.056>.  
URL <http://www.sciencedirect.com/science/article/pii/S2352340916307168>
- 610 [20] T. Mikolov, K. Chen, G. Corrado, J. Dean, Efficient estimation of word representations  
in vector space, arXiv preprint arXiv:1301.3781.
- 612 [21] J. R. Firth, A synopsis of linguistic theory 1930-55., Studies in Linguistic Analysis  
(special volume of the Philological Society) 1952-59 (1957) 1–32.
- 614 [22] Alexa, reddit.com Traffic Statistics (2019).  
URL <http://www.webcitation.org/78slF14Po>
- 616 [23] Reddit Inc., Press.  
URL <http://www.webcitation.org/78slKkkgX>

- 618 [24] A. Rosen, Tweeting Made Easier.  
URL <http://www.webcitation.org/78slQ2VNd>
- 620 [25] A. Magge, A. Sarker, A. Nikfarjam, G. Gonzalez-Hernandez, Comment on: “Deep learn-  
622 ing for pharmacovigilance: recurrent neural network architectures for labeling adverse  
drug reactions in Twitter posts”, *Journal of the American Medical Informatics Associ-*  
*ation* 26 (6) (2019) 577–579. doi:10.1093/jamia/ocz013.
- 624 [26] J. Baumgarten, Reddit data dump.  
URL <https://files.pushshift.io/reddit/>
- 626 [27] D. S. Wishart, Y. D. Feunang, A. C. Guo, E. J. Lo, A. Marcu, J. R. Grant, T. Sajed,  
D. Johnson, C. Li, Z. Sayeeda, N. Assempour, I. Iynkkaran, Y. Liu, A. Maciejewski,  
628 N. Gale, A. Wilson, L. Chin, R. Cummings, D. Le, A. Pon, C. Knox, M. Wilson,  
DrugBank 5.0: a major update to the DrugBank database for 2018., *Nucleic acids*  
630 *research* 46 (D1) (2018) D1074–D1082. doi:10.1093/nar/gkx1037.
- [28] M. Kuhn, I. Letunic, L. J. Jensen, P. Bork, The SIDER database of drugs and side  
632 effects., *Nucleic acids research* 44 (D1) (2016) D1075–9. doi:10.1093/nar/gkv1075.
- [29] E. G. Brown, L. Wood, S. Wood, The medical dictionary for regulatory activities (Med-  
634 DRA)., *Drug safety* 20 (2) (1999) 109–117. doi:10.2165/00002018-199920020-00002.
- [30] J. Shang, J. Liu, M. Jiang, X. Ren, C. R. Voss, J. Han, Automated Phrase Mining from  
636 Massive Text Corpora, *IEEE Transactions on Knowledge and Data Engineering* 30 (10)  
(2018) 1825–1837. doi:10.1109/TKDE.2018.2812203.
- 638 [31] J. Liu, J. Shang, C. Wang, X. Ren, J. Han, Mining Quality Phrases from Massive  
Text Corpora, in: *Proceedings of the 2015 ACM SIGMOD International Conference on*  
640 *Management of Data, SIGMOD '15*, ACM, New York, NY, USA, 2015, pp. 1729–1744.  
doi:10.1145/2723372.2751523.
- 642 [32] Q. T. Zeng, T. Tse, G. Divita, A. Keselman, J. Crowell, A. C. Browne, S. Goryachev,  
L. Ngo, Term identification methods for consumer health vocabulary development.,  
644 *Journal of medical Internet research* 9 (1) (2007) e4. doi:10.2196/jmir.9.1.e4.
- [33] R. Řehůřek, P. Sojka, Software Framework for Topic Modelling with Large Corpora,  
646 in: *Proceedings of the LREC 2010 Workshop on New Challenges for NLP Frameworks*,  
ELRA, Valletta, Malta, 2010, pp. 45–50, [http://is.muni.cz/publication/884893/](http://is.muni.cz/publication/884893/en)  
648 [en](http://is.muni.cz/publication/884893/en).
- [34] H. Caselles-Dupré, F. Lesaint, J. Royo-Letelier, Word2Vec Applied to Recommen-  
650 dation: Hyperparameters Matter, in: *Proceedings of the 12th ACM Conference on*  
*Recommender Systems, RecSys '18*, ACM, New York, NY, USA, 2018, pp. 352–356.  
652 doi:10.1145/3240323.3240377.
- [35] S. Pakhomov, B. McInnes, T. Adam, Y. Liu, T. Pedersen, G. B. Melton, Semantic  
654 Similarity and Relatedness between Clinical Terms: An Experimental Study, *AMIA ...*

- Annual Symposium proceedings. AMIA Symposium 2010 (2010) 572–576.  
656 URL <https://www.ncbi.nlm.nih.gov/pubmed/21347043>
- [36] T. Pedersen, S. V. S. Pakhomov, S. Patwardhan, C. G. Chute, Measures of semantic  
658 similarity and relatedness in the biomedical domain., *Journal of biomedical informatics*  
40 (3) (2007) 288–299. doi:10.1016/j.jbi.2006.06.004.
- [37] W. E. Winkler, String Comparator Metrics and Enhanced Decision Rules in the Fellegi-  
660 Sunter Model of Record Linkage.
- [38] L. Philips, Hanging on the metaphone, *Computer Language* 7.  
662
- [39] J. L. Fleiss, Measuring nominal scale agreement among many raters., *Psychological*  
664 *Bulletin* 76 (5) (1971) 378–382. doi:10.1037/h0031619.
- [40] A. J. Conger, Integration and generalization of kappas for multiple raters., *Psychological*  
666 *Bulletin* 88 (2) (1980) 322–328. doi:10.1037/0033-2909.88.2.322.
- [41] J. L. Fleiss, B. Levin, M. C. Paik, *Statistical methods for rates and proportions*, John  
668 Wiley & Sons, 2013.
- [42] Q. Chen, Y. Peng, Z. Lu, BioSentVec: creating sentence embeddings for biomedical  
670 texts, arXiv preprint arXiv:1810.09302.
- [43] S. Moen, T. S. S. Ananiadou, Distributional semantics resources for biomedical text  
672 processing, *Proceedings of LBM* (2013) 39–44.
- [44] J. Pennington, R. Socher, C. Manning, Glove: Global vectors for word representation,  
674 in: *Proceedings of the 2014 conference on empirical methods in natural language pro-*  
cessing (EMNLP), 2014, pp. 1532–1543.
- [45] Google, word2vec (2013).  
676 URL <https://code.google.com/archive/p/word2vec/>
- [46] L. van der Maaten, G. Hinton, Visualizing data using t-SNE, *Journal of machine learning*  
678 *research* 9 (Nov) (2008) 2579–2605.
- [47] S. V. S. Pakhomov, G. Finley, R. McEwan, Y. Wang, G. B. Melton, Corpus domain  
680 effects on distributional semantic modeling of medical terms., *Bioinformatics* (Oxford,  
682 England) 32 (23) (2016) 3635–3644. doi:10.1093/bioinformatics/btw529.
- [48] Y. Wang, S. Liu, N. Afzal, M. Rastegar-Mojarad, L. Wang, F. Shen, P. Kingsbury,  
684 H. Liu, A comparison of word embeddings for the biomedical natural language process-  
ing., *Journal of biomedical informatics* 87 (2018) 12–20. doi:10.1016/j.jbi.2018.  
686 09.008.
- [49] U.S. Food and Drug Administration, FDA and Kratom (2019).  
688 URL <http://www.webcitation.org/78su4HgD1>



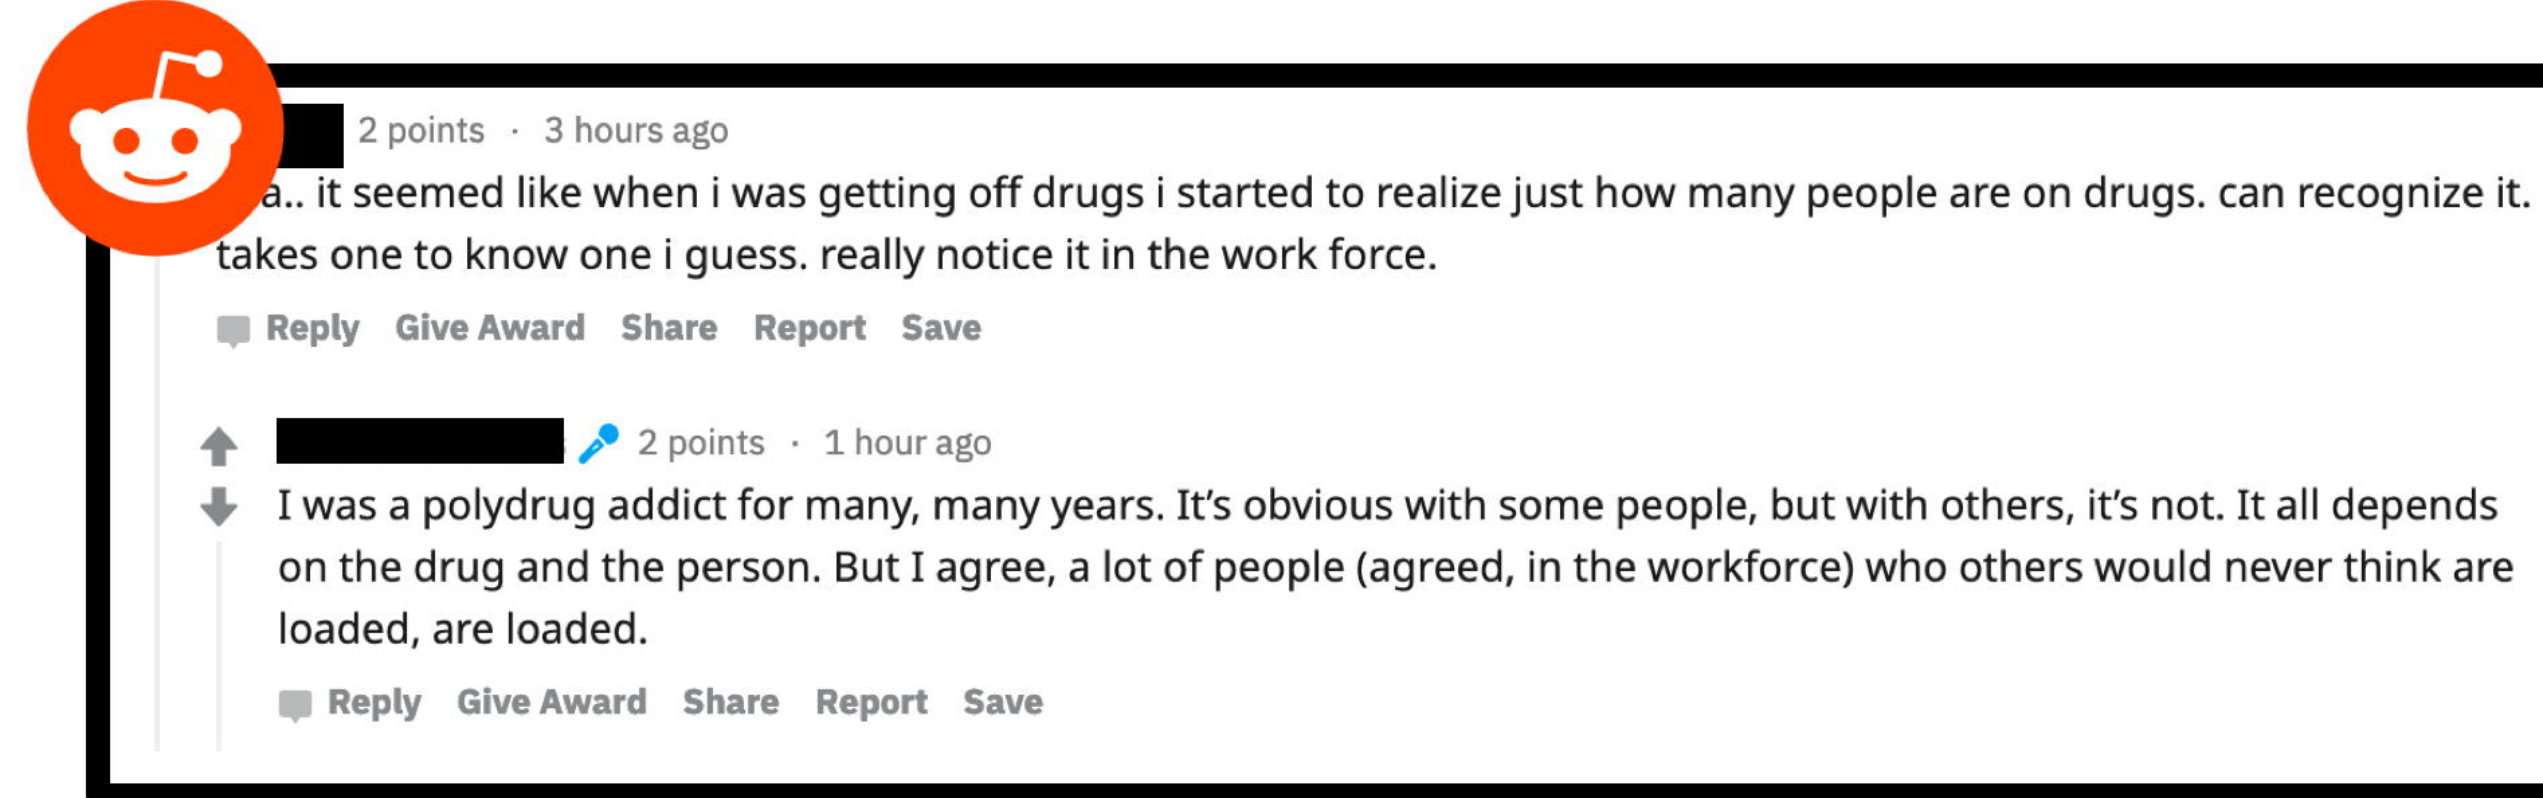

Filter for Comments from Health Enriched Subreddits

Phrase Discovery

CBOW Modeling

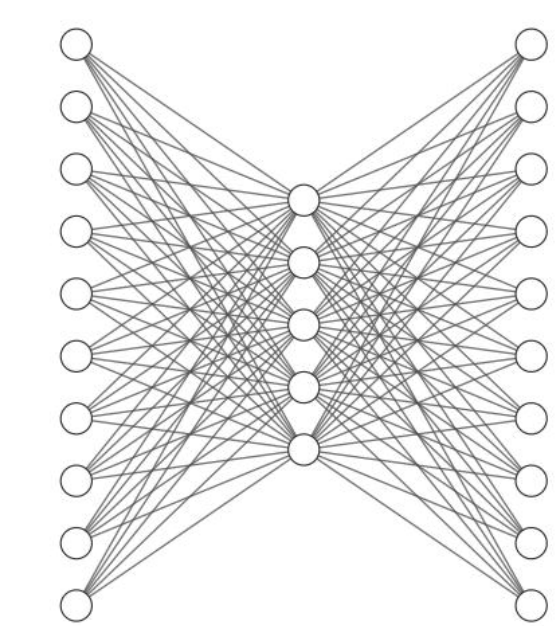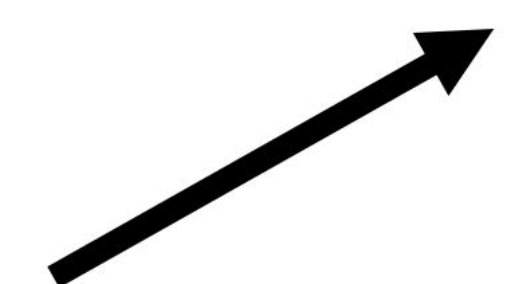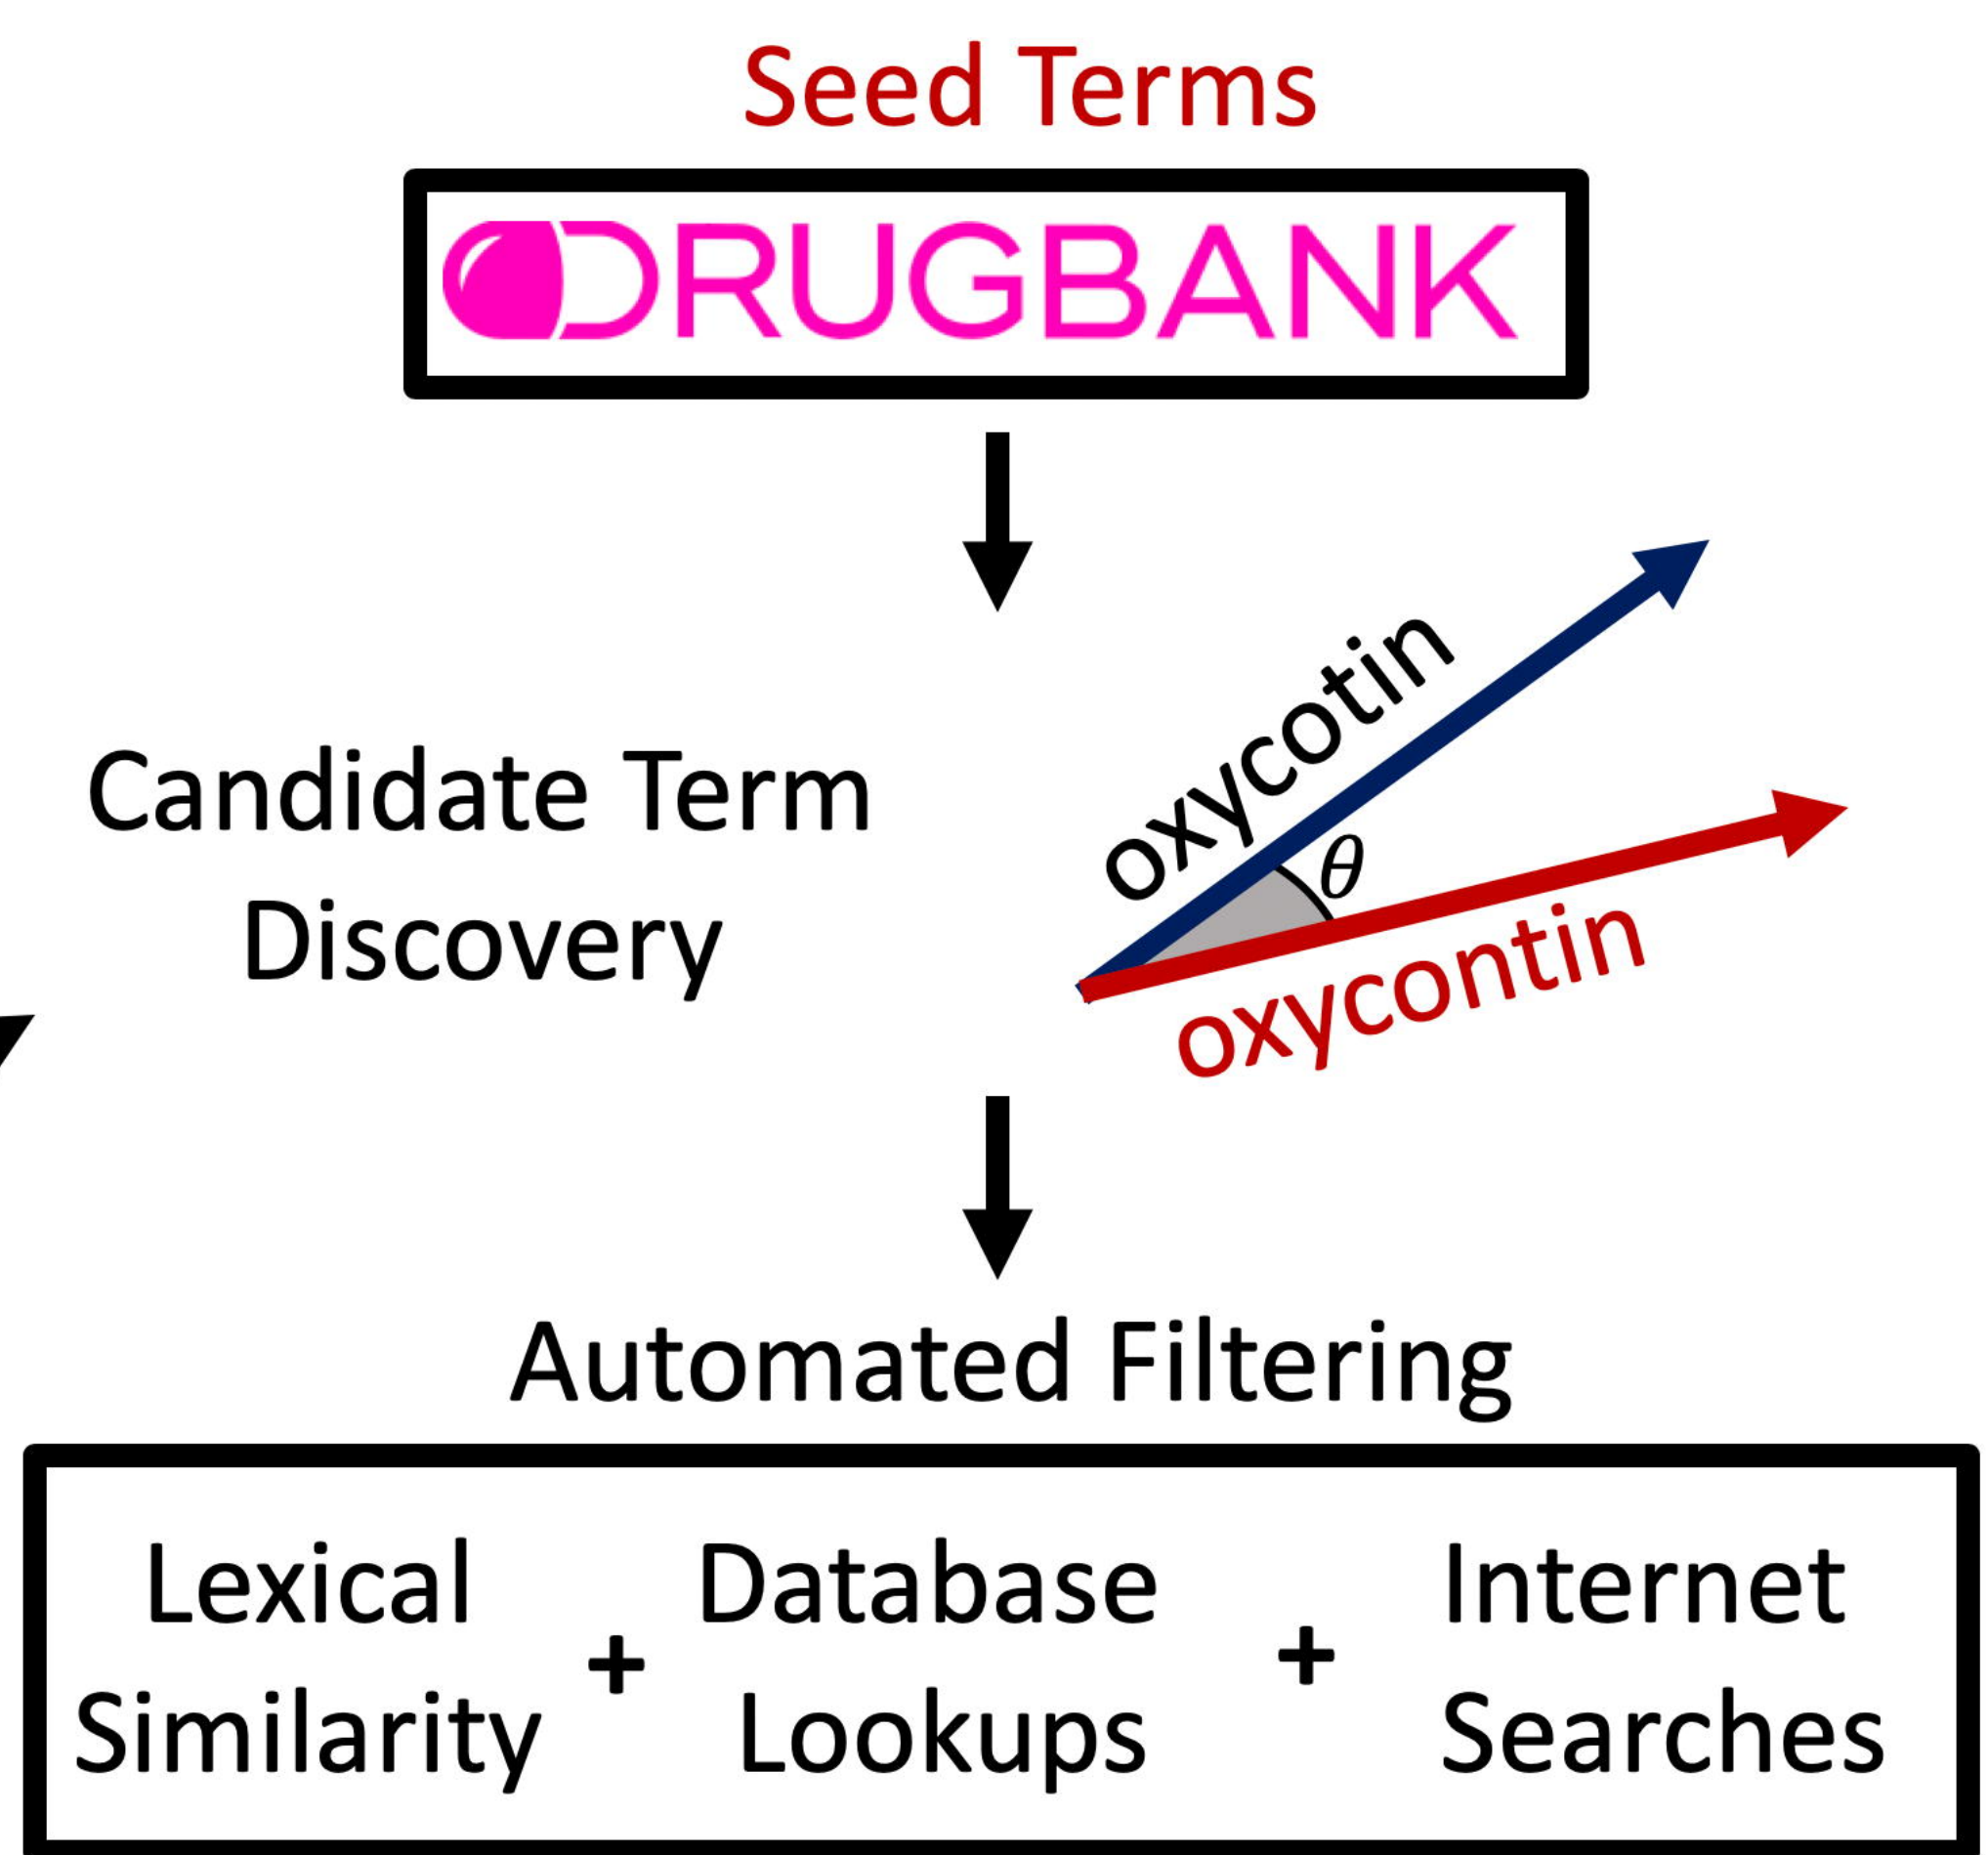



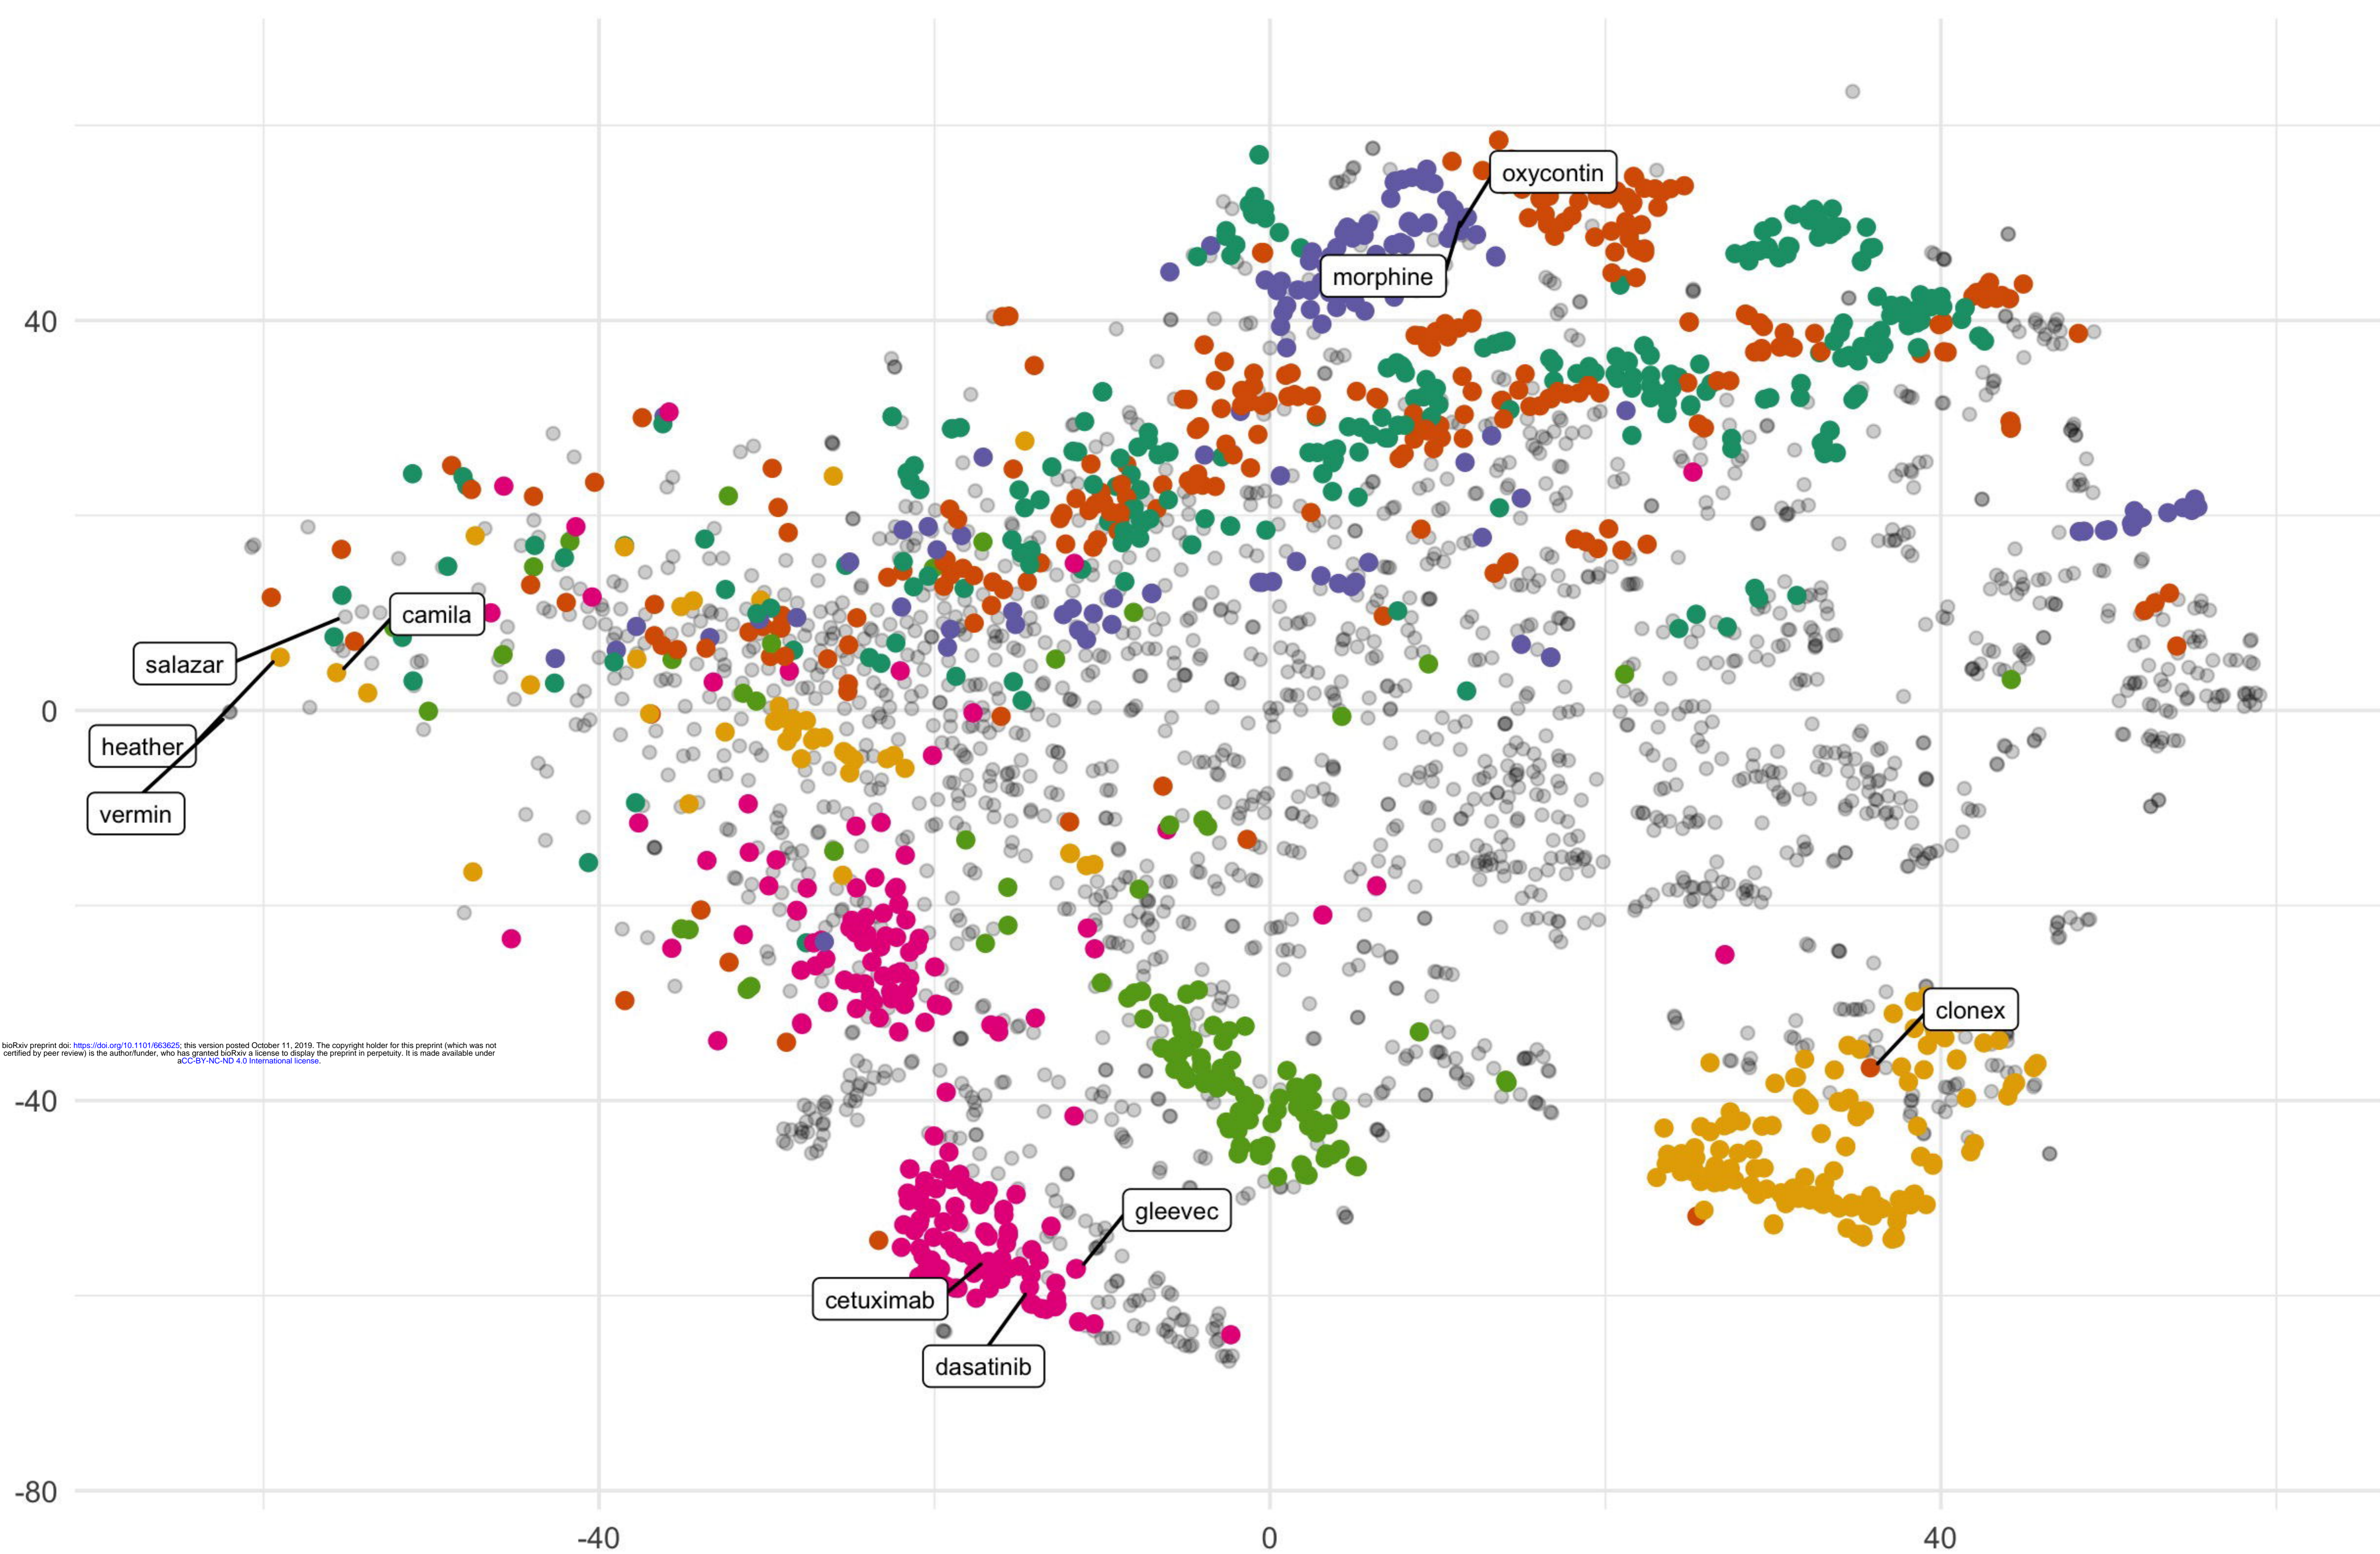

ATC code

- |                                                           |                                                                 |                                                            |
|-----------------------------------------------------------|-----------------------------------------------------------------|------------------------------------------------------------|
| <span style="color: yellow;">●</span> Sex hormones (G03)  | <span style="color: pink;">●</span> Antineoplastic agents (L01) | <span style="color: orange;">●</span> Psycholeptics (N05)  |
| <span style="color: green;">●</span> Antibacterials (J01) | <span style="color: blue;">●</span> Analgesics (N02)            | <span style="color: teal;">●</span> Psychoanaleptics (N06) |



# Automated

known

misspelling

synonym

negative

bioRxiv preprint doi: <https://doi.org/10.1101/663625>; this version posted October 11, 2019. The copyright holder for this preprint (which was not certified by peer review) is the author/funder, who has granted bioRxiv a license to display the preprint in perpetuity. It is made available under aCC-BY-NC-ND 4.0 International license.

known

0.86  
(48)

0.00  
(0)

0.09  
(5)

0.05  
(3)

misspelling

0.03  
(3)

0.92  
(84)

0.02  
(2)

0.02  
(2)

Human

synonym

0.20  
(9)

0.13  
(6)

0.37  
(17)

0.30  
(14)

negative

0.01  
(6)

0.03  
(24)

0.05  
(40)

0.90  
(658)

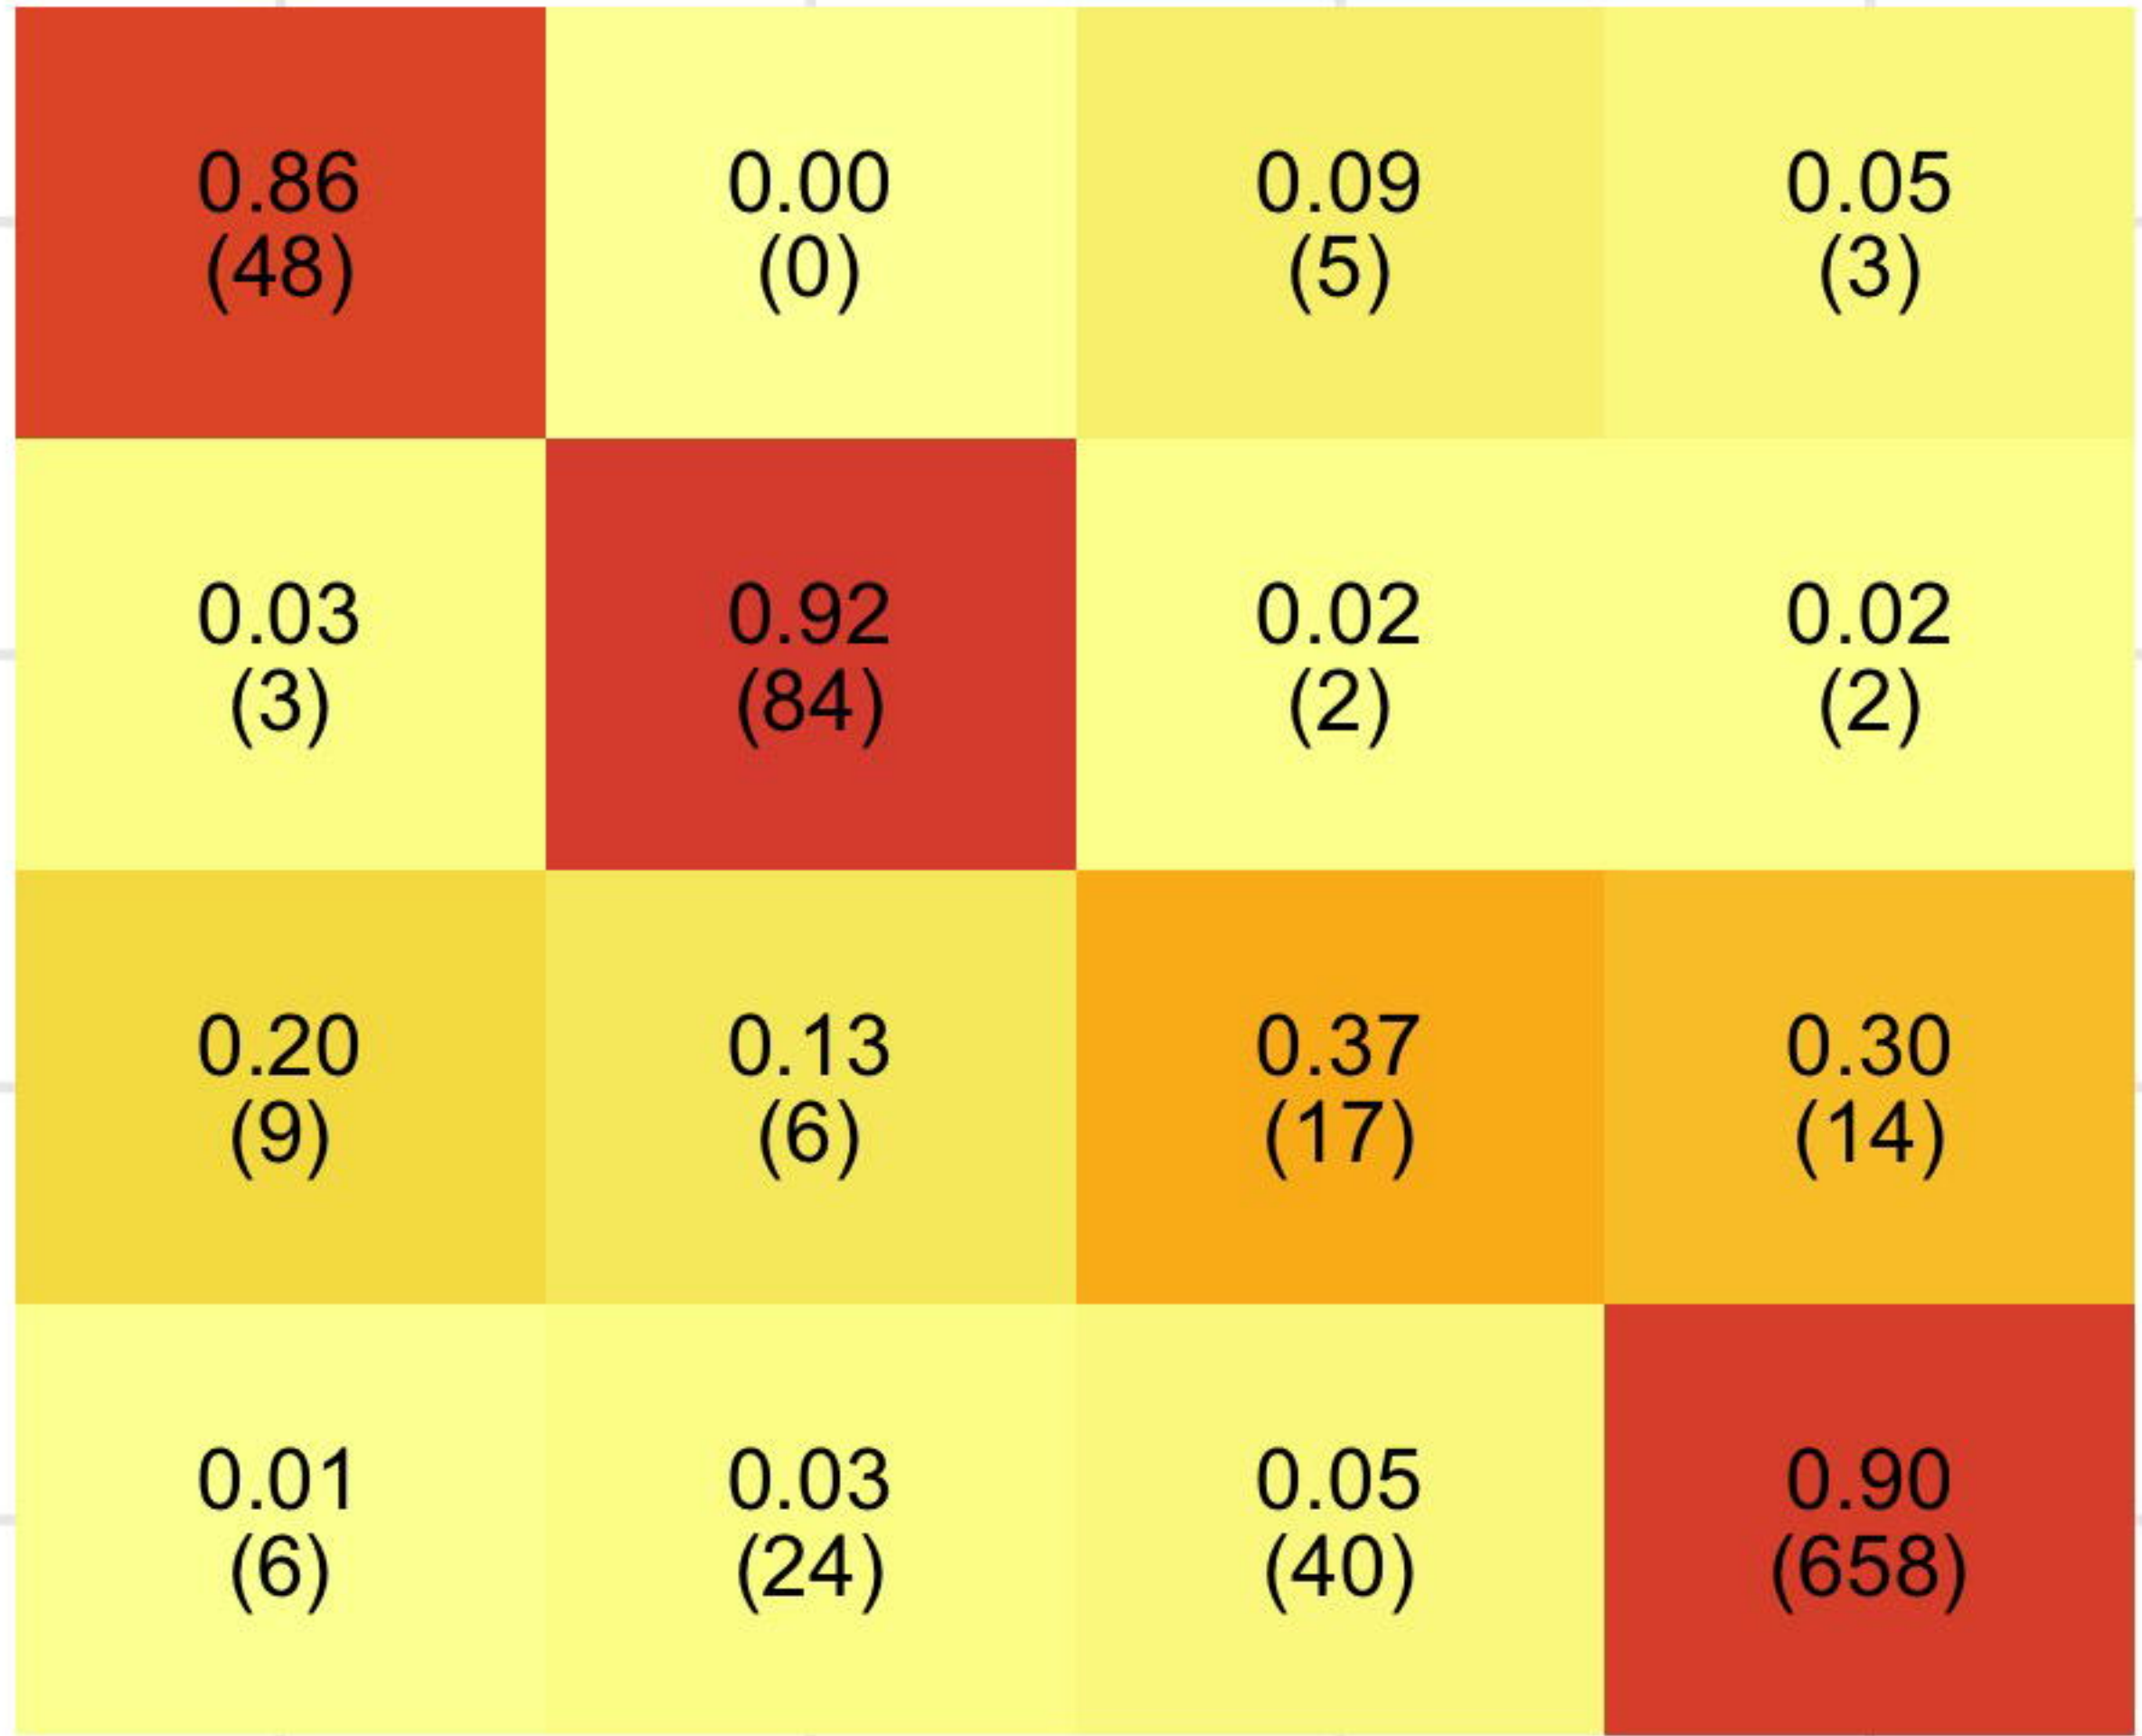

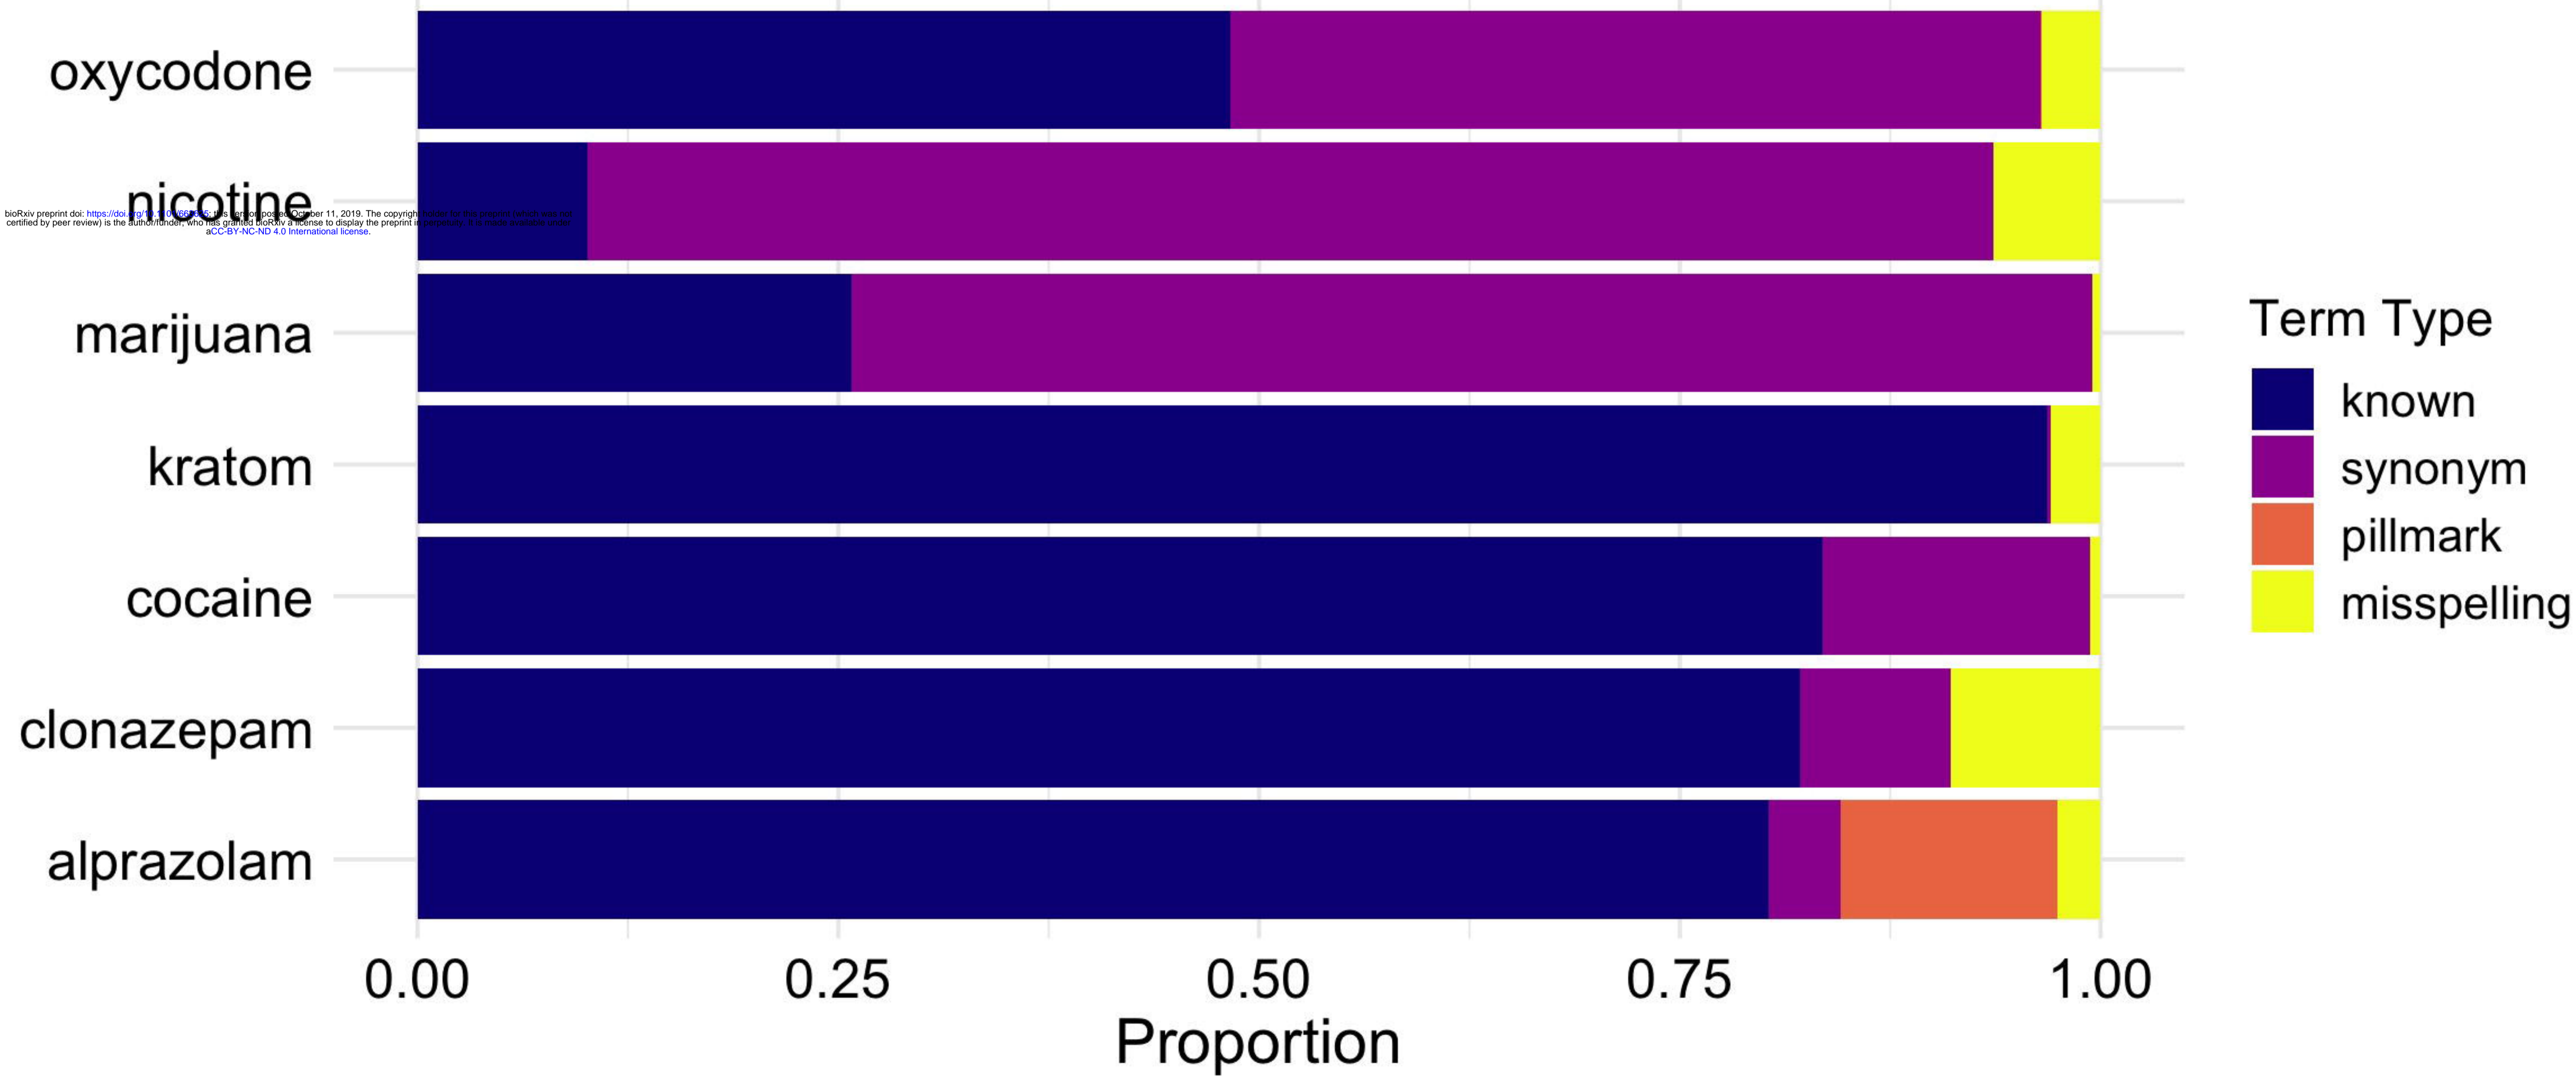

Source: https://www.biorxiv.org/content/10.1101/663625v3.full.pdf
